# Supplementary material
Source: PubMed Central journal article supplement (PMC3454878)
Supplement: 0c56b4b898fb13c7c1a40d8758dcedff_genetics.112.143719-7.pdf [file 0c56b4b898fb13c7c1a40d8758dcedff_genetics.112.143719-7.pdf]

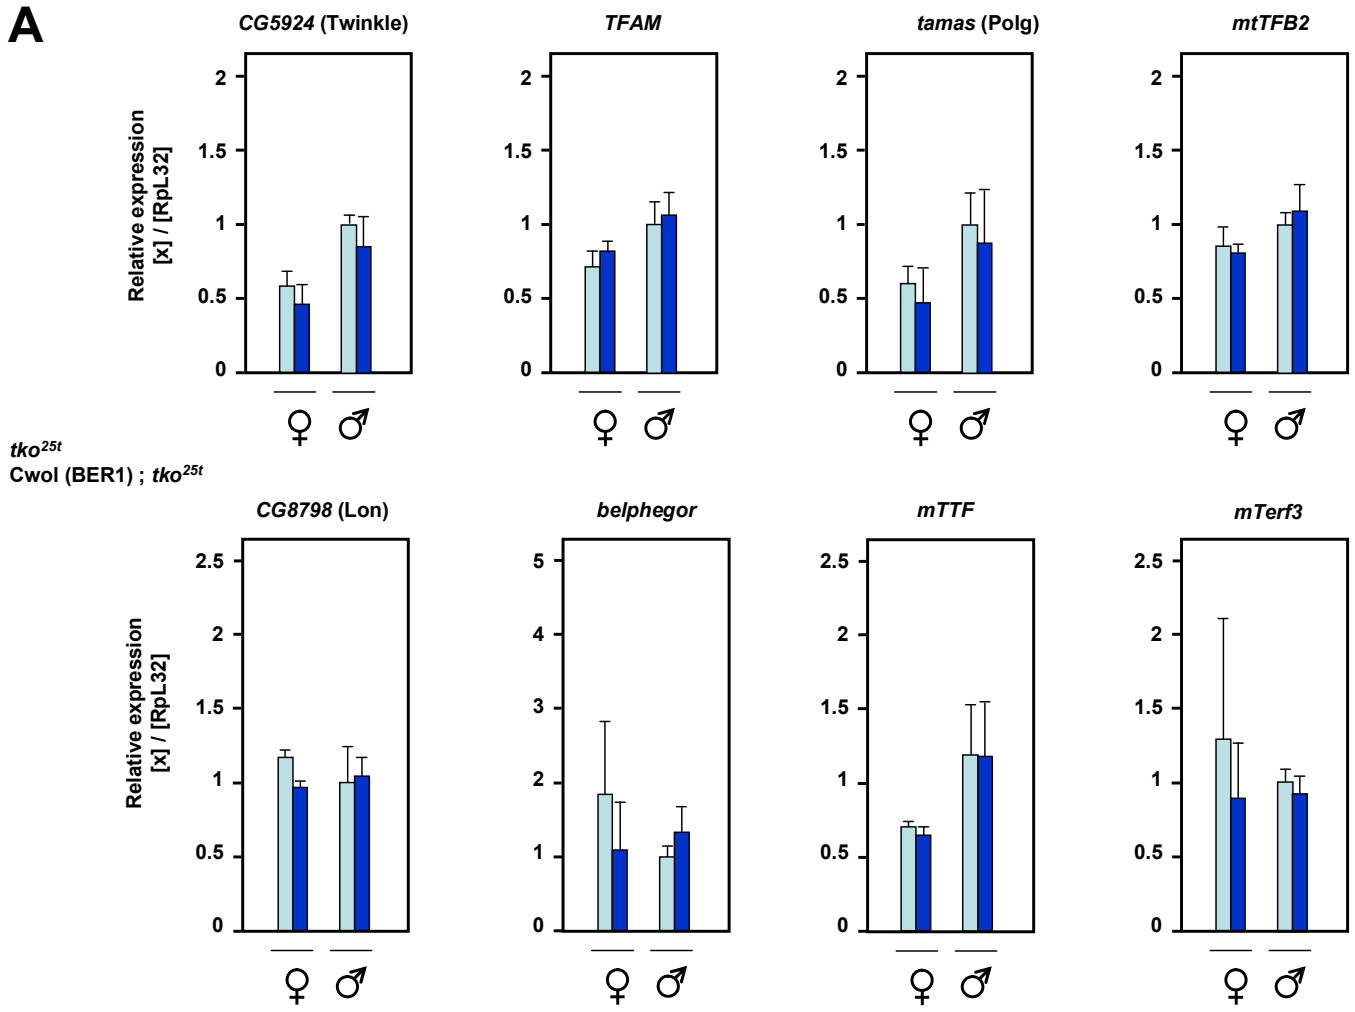

**B**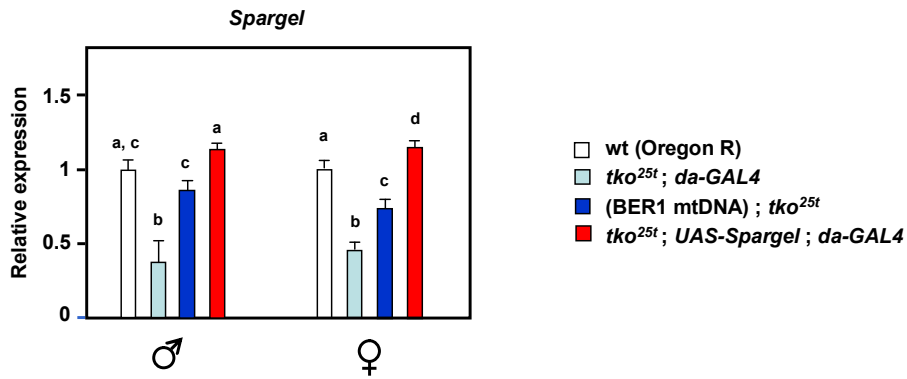

**Figure S5** Expression levels of genes with known or proposed roles in mtDNA metabolism in *tko*<sup>25t</sup> flies, in different mtDNA backgrounds. Q-RT-PCR of the indicated mRNAs, normalized to that of *RpL32* and then to the values for *tko*<sup>25t</sup> females in the original (Oregon R-related) strain background, in flies of the strains and sex indicated. (A) Despite varying expression levels in males versus females, there were no significant differences between *tko*<sup>25t</sup> flies of a given sex in the two mtDNA backgrounds tested (*t* test,  $p > 0.05$  in all cases). (B) Use of the *UAS-Spargel* transgene, in combination with the ubiquitous *da-GAL4* driver, over-ride the downregulation of *Spargel* in *tko*<sup>25t</sup> flies. a, b, c, d denote significantly different data classes (Newman-Keuls test,  $p < 0.05$ , based on ANOVA,  $p < 0.01$ )
