# Supplementary material
Source: PubMed Central journal article supplement (PMC3454878)
Supplement: 1b069dd87a71956fdcf84f3948e50148_genetics.112.143719-5.pdf [file 1b069dd87a71956fdcf84f3948e50148_genetics.112.143719-5.pdf]

**A**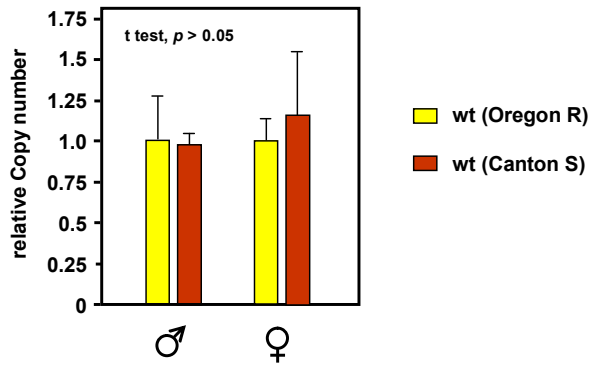**B**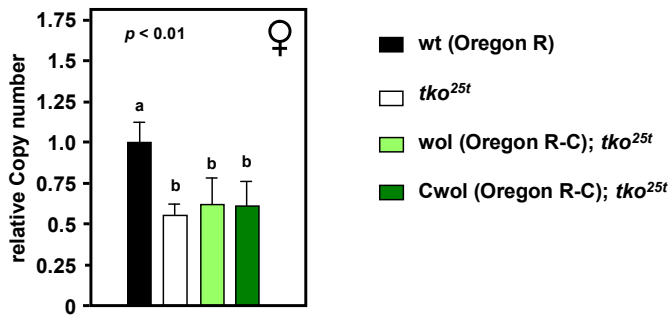**C**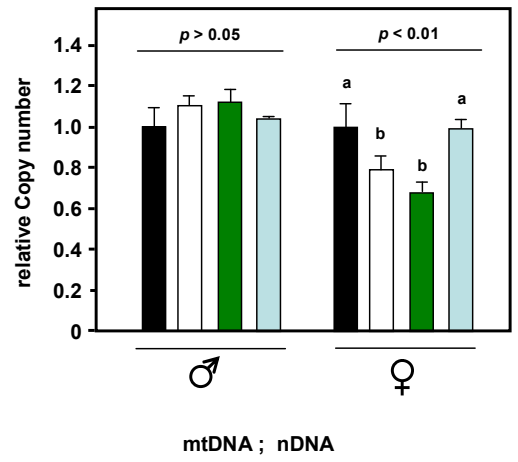

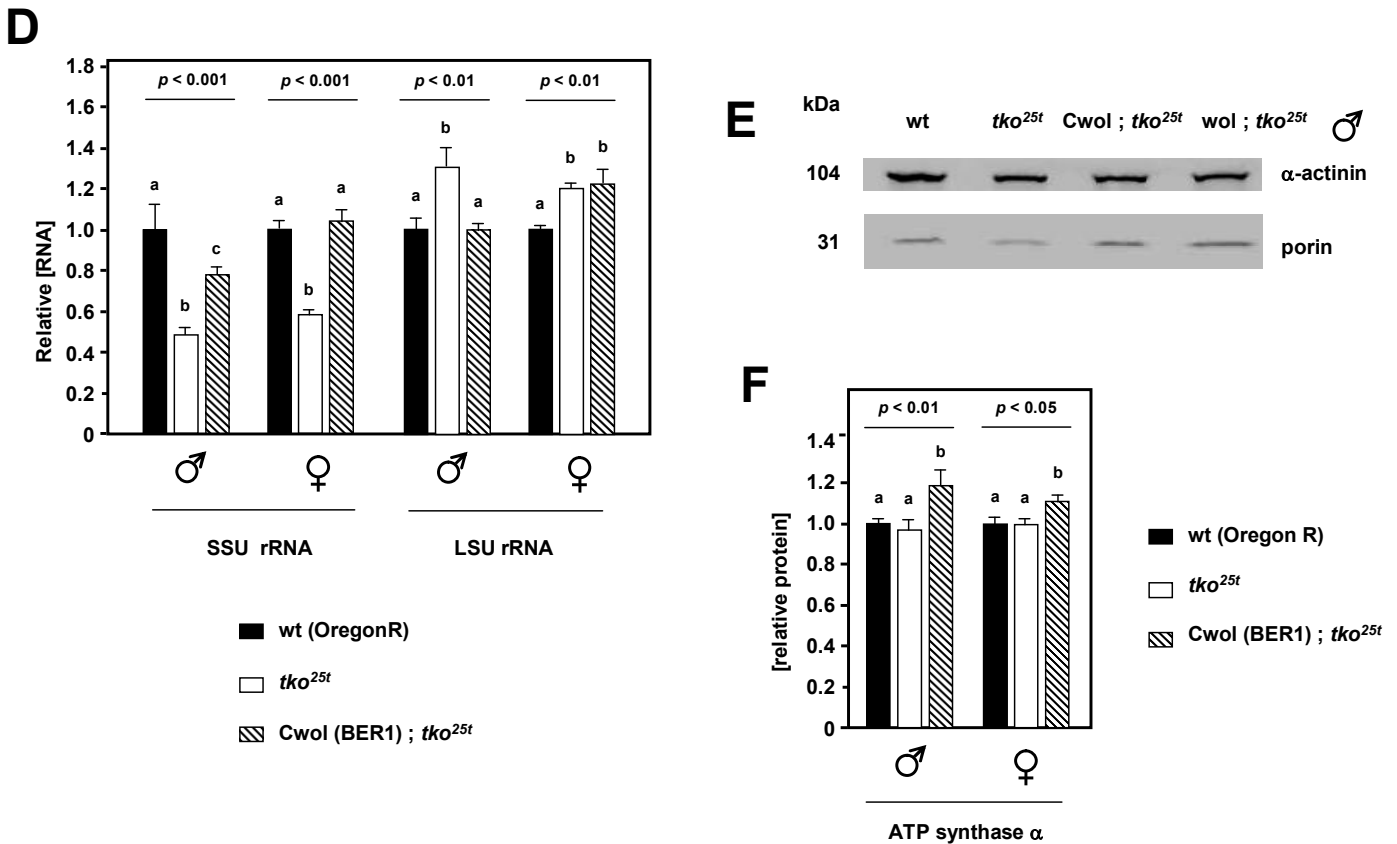

**Figure S2** Molecular correlates of partial suppression of *tko*<sup>25t</sup> by the suppressor mtDNA backgrounds. (A) Supplementary data to Fig. 2D: copy number of mtDNA in two different wild-type strains is similar. Copy number, relative to 18S rDNA, means  $\pm$  SD, was normalized to that in Oregon R flies of the same sex. The copy number differences seen in *tko*<sup>25t</sup> flies in different backgrounds (Fig. 2D) are outside the range of variation due to strain background only. (B) Supplementary data to Fig. 2D: the copy number of mtDNA in female *tko*<sup>25t</sup> flies is significantly lower than in wild-type flies also in a second non-suppressor mtDNA background (Oregon R-C). Data from first two columns reproduced from Fig.2D (experiments were carried out in parallel). (C) Further supplementary data to Fig. 2D: mtDNA copy number is not altered by BER1 mtDNA in a wild-type nuclear background. a, b denote significantly different data classes. Oregon R\* denotes the mtDNA of the original *tko*<sup>25t</sup> strain, whose sequence is very similar (but not identical) to Oregon R or Oregon R-C (Table S1). (D) Supplementary data to Fig. 2E: levels of mitochondrial SSU and LSU rRNA levels in flies of the indicated genotypes relative to the *mRpl32* mRNA standard, means  $\pm$  SD, normalized to the values in wild-type Oregon R flies of the given sex. The same data were used to compute the SSU/LSU ratios plotted in Fig. 2E. The decreased ratio of SSU to LSU rRNA in *tko*<sup>25t</sup> flies consists of a decrease in SSU rRNA combined with a small, perhaps compensatory increase in that of LSU rRNA, as reported previously (KEMPPAINEN *et al.* 2009). (E) Representative Western blot of protein extracts from males flies of the indicated genotype, probed for porin (mitochondrial outer membrane marker) and for  $\alpha$ -actinin (cytosolic loading control). The global amount of mitochondria, as measured by this assay, is decreased in the presence of the *tko*<sup>25t</sup> mutation in the original (Oregon R-related) mtDNA background, but restored to wild-type levels in the BER1 background, whether *Wolbachia* are present (wol) or absent (Cwol). The summary data of Fig. 2F are compiled from densitometry of this and equivalent blots. (F) Levels of a representative subunit of complex V (ATP synthase, subunit  $\alpha$ ), based on densitometry of Western blots, normalized against a cytosolic loading control ( $\alpha$ -actinin). In all panels a and b denote significantly different data classes (Newman-Keuls test,  $p < 0.05$ , based on ANOVA,  $p$  values as indicated, each sex and, where appropriate, each gene considered separately).
