# Supplementary material
Source: PubMed Central journal article supplement (PMC3454878)
Supplement: 2bae51aaf5a3f3c612a1c7fb17148e1c_genetics.112.143719-3.pdf [file 2bae51aaf5a3f3c612a1c7fb17148e1c_genetics.112.143719-3.pdf]

Table S1 Sequence polymorphism in mtDNA coding region of suppressor and non-suppressor strains compared with Refseq

| Nucleotide change | Gene  | Coding change | BER1 | QI2 | CO3 | Reids-1 | <i>tko</i> <sup>25f</sup> (original) | Oregon R-C | Canton S | Oregon R |
|-------------------|-------|---------------|------|-----|-----|---------|--------------------------------------|------------|----------|----------|
| 671C>T            | ND2   | silent        | X    |     |     |         |                                      |            | X        |          |
| 710G>A            | ND2   | silent        | X    |     |     |         |                                      |            | X        |          |
| 735C>T            | ND2   | silent        | X    |     |     |         |                                      |            | X        |          |
| 791A>G            | ND2   | silent        | X    |     |     |         |                                      |            | X        |          |
| 838TA>AT          | ND2   | L>Y           | X    | X   | X   | X       | X                                    | X          | X        | X        |
| 1068A>C           | ND2   | I>L           | X    |     |     |         |                                      |            | X        |          |
| 1154T>C           | ND2   | silent        |      |     |     |         |                                      |            | X        |          |
| 1478G>A           | COI   | R>Q           |      |     |     |         | X                                    |            |          |          |
| 1512T>C           | COI   | silent        |      |     |     |         |                                      |            | X        |          |
| 1674G>A           | COI   | silent        | X    |     |     |         |                                      |            | X        |          |
| 1779A>T           | COI   | silent        | X    |     |     |         |                                      |            | X        |          |
| 1836A>G           | COI   | silent        | X    |     |     |         |                                      |            | X        |          |
| 1861T>C           | COI   | silent        | X    |     |     |         |                                      |            | X        |          |
| 1917A>G           | COI   | silent        | X    |     |     |         |                                      |            |          |          |
| 1929G>A           | COI   | silent        | X    |     |     |         |                                      |            | X        |          |
| 2071C>T           | COI   | silent        | X    |     |     |         |                                      |            |          |          |
| 2136G>A           | COI   | silent        |      | X   | X   |         |                                      |            |          |          |
| 2160T>C           | COI   | silent        | X    |     |     |         |                                      |            | X        |          |
| 2187C>T           | COI   | silent        | X    |     |     |         |                                      |            | X        |          |
| 2661C>T           | COI   | silent        | X    |     |     |         |                                      |            |          |          |
| 2863C>T           | COI   | silent        | X    | X   | X   | X       | X                                    | X          | X        | X        |
| 2928A>T           | COI   | Q>H           |      |     |     | X       |                                      |            |          |          |
| 2964G>A           | COI   | silent        | X    |     |     |         |                                      |            | X        |          |
| 3517T>C           | COII  | silent        | X    |     |     |         |                                      |            | X        |          |
| 3583T>C           | COII  | silent        | X    |     |     |         |                                      |            |          |          |
| 3685G>A           | COII  | silent        | X    |     |     |         |                                      |            | X        |          |
| 4088C>T           | A6    | silent        |      |     |     |         | X                                    | X          |          | X        |
| 4096T>C           | A6    | L>S           | X    | X   | X   | X       | X                                    | X          | X        | X        |
| 4247A>T           | A6    | silent        | X    |     |     |         |                                      |            | X        |          |
| 4592T>A           | A6    | N>K           |      |     |     |         | X                                    | X          |          | X        |
| 4599T>C           | A6    | S>P           | X    |     |     |         |                                      |            | X        |          |
| 4616A>T           | A6    | silent        |      |     |     |         |                                      |            | X        |          |
| 4620A>G           | A6    | M>V           | X    |     |     |         |                                      |            | X        |          |
| 4694G>A           | A6    | silent        |      |     |     | X       |                                      |            |          |          |
| 4762C>T           | COIII | silent        | X    |     |     |         |                                      |            | X        |          |
| 4898G>A           | COIII | V>M           |      |     |     | X       |                                      |            |          |          |

|               |            |          |   |   |   |   |   |   |   |   |
|---------------|------------|----------|---|---|---|---|---|---|---|---|
| 5212A>G       | COIII      | silent   | X |   |   |   |   |   | X |   |
| 5347C>T       | COIII      | silent   | X |   |   |   |   |   |   |   |
| 5396T>C       | COIII      | silent   |   | X | X | X | X | X | X | X |
| 5419C>T       | COIII      | silent   |   | X | X | X | X | X |   | X |
| 5524A>G       | COIII      | silent   | X | X | X | X |   |   |   |   |
| 5644C>T       | ND3        | silent   |   | X | X | X | X | X |   | X |
| 5964delAT     | intergenic |          |   | X | X |   |   |   |   |   |
| 5966delAT     | intergenic |          |   | X | X | X | X | X | X | X |
| 5966ATT>TTATA | intergenic |          | X |   |   |   |   |   |   |   |
| 6050insTTAAT  | intergenic |          |   |   |   |   |   |   | X |   |
| 6301A>C       | tRNA-glu   | TΨCloop  |   |   |   |   |   |   | X |   |
| 6305C>T       | tRNA-glu   | TΨCloop  | X | X | X | X | X | X | X | X |
| 6620A>T       | ND5        | I>M      |   | X | X | X | X | X |   | X |
| 6982A>G       | ND5        | silent   |   | X | X | X | X | X | X | X |
| 7130delCAATTC | ND5        | delIG    | X | X | X | X | X | X |   | X |
| 7180G>A       | ND5        | silent   | X |   |   |   |   |   | X |   |
| 7870G>A       | ND5        | silent   | X |   |   |   |   |   |   |   |
| 7888G>A       | ND5        | silent   | X |   |   |   |   |   | X |   |
| 7906T>C       | ND5        | silent   |   |   |   |   | X | X |   | X |
| 8153T>A       | tRNA-his   | DHU loop | X |   |   |   |   |   |   |   |
| 8875G>A       | ND4        | silent   |   |   |   |   |   |   | X |   |
| 8944AC>GA     | ND4        | Y>H      | X | X | X | X | X | X | X | X |
| 8981C>T       | ND4        | silent   | X |   |   |   |   |   |   |   |
| 9005A>G       | ND4        | silent   | X |   |   |   |   |   | X |   |
| 9044T>A       | ND4        | silent   | X |   |   |   |   |   | X |   |
| 9064C>A       | ND4        | V>L      |   |   |   |   |   |   | X |   |
| 9187A>G       | ND4        | silent   | X |   |   |   |   |   | X |   |
| 9783G>A       | ND4L       | silent   | X |   |   |   | X | X |   | X |
| 9886delT      | tRNA-thr   | TΨCloop  |   |   |   |   | X | X |   | X |
| 9990C>T       | ND6        | silent   | X |   |   |   |   |   | X |   |
| 10225C>T      | ND6        | silent   | X |   |   |   |   |   |   |   |
| 10289C>A      | ND6        | S>Y      |   |   |   | X |   |   |   |   |
| 10389C>T      | ND6        | silent   | X |   |   |   |   |   | X |   |
| 10905A>G      | Cyt b      | Silent   | X |   |   |   |   |   |   |   |
| 10925T>G      | Cyt b      | V>G      | X | X | X | X | X | X | X | X |
| 10935T>A      | Cyt b      | silent   | X | X | X | X | X | X | X | X |
| 10952AC>CA    | Cyt b      | Y>S      | X | X | X | X | X | X | X | X |
| 11265C>T      | Cyt b      | silent   | X |   | X |   |   |   | X |   |
| 11279C>A      | Cyt b      | T>N      | X | X | X | X | X | X | X | X |
| 11560T>C      | Cyt b      | silent   | X |   |   |   |   |   | X |   |
| 11893T>A      | ND1        | I>F      | X | X | X | X | X | X | X | X |

|            |          |        |   |   |   |   |   |   |   |   |
|------------|----------|--------|---|---|---|---|---|---|---|---|
| 11916GG>CC | ND1      | P>G    | X | X | X | X | X | X |   |   |
| 11987C>A   | ND1      | L>F    | X | X | X | X | X | X | X | X |
| 12060T>G   | ND1      | N>T    | X | X | X | X | X | X | X | X |
| 12062C>A   | ND1      | silent |   |   |   |   | X | X |   | X |
| 12091C>T   | ND1      | V>M    | X |   |   |   |   |   | X |   |
| 12131T>C   | ND1      | silent |   | X | X |   |   |   | X |   |
| 12316A>G   | ND1      | silent |   | X | X |   |   |   |   |   |
| 12344A>C   | ND1      | silent |   |   |   |   |   |   | X |   |
| 12380C>T   | ND1      | silent |   |   |   |   |   |   | X |   |
| 12626T>C   | ND1      | silent | X | X | X | X | X | X | X | X |
| 12804T>C   | LSU rRNA |        |   | X | X | X | X | X |   | X |
| 13065delA  | LSU rRNA |        |   | X | X | X | X | X |   | X |
| 13289T>A   | LSU rRNA |        | X | X | X | X | X | X | X | X |
| 13295delA  | LSU rRNA |        | X | X | X | X | X | X | X | X |
| 13561C>T   | LSU rRNA |        |   |   |   |   |   |   | X |   |
| 13587G>A   | LSU rRNA |        |   |   |   |   |   | X |   | X |
| 14698T>C   | SSU rRNA |        |   | X | X |   |   |   |   |   |

**Notes:**

All numbering based on Refseq (NCBI accession NC\_001709). Oregon R sequence from NCBI accession AF200828

New database submissions: *tko*<sup>25t</sup> original strain, full genome sequence, NCBI accession JQ686693 ; BER1 full genome sequence, NCBI accession JQ686694; Oregon R-C full genome sequence, NCBI accession JQ686698; CO3 coding region sequence, NCBI accession JQ686695;

QI2 coding region sequence, NCBI accession JQ686696; Reids-1 coding region sequence, NCBI accession JQ686697; Canton S coding region sequence, NCBI accession JQ686699

**Yellow** background denotes strain-specific polymorphisms

**Blue** background denotes polymorphisms over-represented in suppressor cytoplasm

**Grey** background denotes polymorphisms over-represented in nonsuppressor cytoplasm

Significant heteroplasmy is excluded, based on the following: our sequencing strategy involved pooling of multiple PCR products, followed by sequencing on both strands using an overlapping primer set. All novel polymorphisms were verified by additional PCR and sequencing. In no case did we find any evidence for heteroplasmy, within the limits of detection by Sanger sequencing (10-15%). Disease-associated heteroplasmy in humans is easily detected by such sequencing, with relative levels of pathological mutant mtDNA in the 50-90% range. Thus we can categorically rule out any significant contribution of heteroplasmy to the *tko*<sup>25t</sup> phenotype, in any of the strains tested. Moreover, *tko*<sup>25t</sup> breeds true phenotypically of over many generations in either the suppressor or non-suppressor background, showing standard X-linked recessive inheritance, which would not be expected if the phenotype were subject to influences of heteroplasmy. Conversely, the suppressor itself shows standard maternal inheritance, which would also not be expected if heteroplasmy were a significant factor in suppression.
