# Supplementary material
Source: PubMed Central journal article supplement (PMC3454878)
Supplement: 2d9a7f3def708a7dd360f6e3bbcbc965_genetics.112.143719-1.pdf [file 2d9a7f3def708a7dd360f6e3bbcbc965_genetics.112.143719-1.pdf]

## File S1

### Supporting Materials And Methods

#### Testing for the presence of *Wolbachia* by PCR

Following the previously published procedure (O'NEILL *et al.* 1992), insect ovary tissue was dissected, homogenized and incubated with 2  $\mu$ l of proteinase K (10 mg/ml) for 30min at 37°C, followed by 5 min at 95°C. Samples were briefly centrifuged, and 1  $\mu$ l of the supernatant was used as the template in subsequent PCR, with *Wolbachia* 16S rRNA-specific primers or universal bacterial 16S rRNA primers (see Table S2), with 30 cycles of 95 °C, 1 min, 52 °C 1 min, 72 °C 1 min.

#### SDS-PAGE and Western blotting

Gels were run in a Mini-Protean® II electrophoresis cell (Bio-Rad) then transferred to nitrocellulose membranes (Invitrogen) membranes using the iBlot™ dry blotting system (Invitrogen). After blotting, membranes were blocked in 5% non-fat milk in TBST buffer (150 mM M NaCl, 50 mM Tris-HCl, 0.05% Tween 20, pH 7.6) for 1 h at room temperature, then incubated with the primary antibody in 1% non-fat milk in TBST buffer overnight at 4 °C. After washing 4 x 15 min in TBST buffer and blocking again in the blocking buffer for 1 h at room temperature, membranes were incubated in the presence of the secondary antibody for 1 h at room temperature, followed by further washes (4 x 15 min) in TBST buffer. Detection was performed with the Amersham ECL™ Western blotting analysis system (GE Healthcare).

#### Preparation of mitochondria for mtDNA isolation

Batches of 50-200 flies were crushed with one stroke of a Teflon pestle in a glass homogenizer in 4 ml HB medium (225 mM mannitol, 75 mM sucrose, 1 mM EDTA, 0.1% BSA, 10 mM Tris-HCl pH7.6) then homogenized with 8 more strokes. The homogenate was transferred to a 15 ml plastic centrifuge tube, filled up with HB, then centrifuged for 5 min at 1,000  $g_{max}$  at 4 °C to pellet cell debris and nuclei. The supernatant was decanted to a new 15 ml tube and crude mitochondria were pelleted for 10 min at 12,000  $g_{max}$  at 4 °C. The pellet was washed once, then resuspended in 300  $\mu$ l HB and overlaid onto a 1.5 M/1 M sucrose (250 + 250  $\mu$ l) step gradient and centrifuged for 1 h at 45,000  $g_{max}$  at 4 °C. The mitochondrial layer was transferred to a 2 ml tube and one volume of HB was added. Mitochondria were pelleted for 5 min at 12,000  $g_{max}$  at 4 °C, then processed immediately for DNA extraction.

#### Repeat analysis of the NCR by end-labeling and partial restriction digestion

Primers Dm14428F and Dm225R (see Table S2), designed to amplify the entire NCR, were individually end-labeled using T4 polynucleotide kinase (T4 PNK, Fermentas), and [ $\gamma$ -<sup>32</sup>P]ATP (Perkin Elmer, 6000 Ci/mmol) under manufacturer's recommended conditions. Each 20  $\mu$ l reaction contained, in manufacturer's Reaction Buffer A, 1 nmol of primer, 10 u of

enzyme and 3  $\mu$ l (30  $\mu$ Ci) of labeled ATP. After incubation at 37  $^{\circ}$ C for 30 min, the reaction was stopped by the addition of 1  $\mu$ l of 0.5 M EDTA (pH 8.0) and further incubation at 75  $^{\circ}$ C for 10 min. The unincorporated label was removed by gel filtration on Sephadex G-50 (GE healthcare). The mtDNA noncoding region was amplified from partially purified mtDNA with end-labeled primer pairs (for 'left' end:  $^{32}$ P-Dm14428F and Dm225R, for 'right' end: Dm14428F and  $^{32}$ P-Dm225R) using LongRange PCR kit (Qiagen), under the following conditions: 93  $^{\circ}$ C, 3 min (initial denaturation), followed by 35 cycles of 93  $^{\circ}$ C, 15 s (denaturation); 50  $^{\circ}$ C, 30 s (annealing); 60  $^{\circ}$ C, 6 min (extension), with final extension at 60  $^{\circ}$ C for 10 min. Restriction site mapping by partial digestion and gel electrophoresis was performed essentially as described previously (LEWIS *et al.* 1994). Briefly, after gel purification (GeneJet gel extraction kit, Fermentas), the radiolabeled fragments (20 ng in 20  $\mu$ l) were partially digested with *PacI* (1 unit, 1 x NEBuffer 1, Biolabs), *Hpy188I* (0.6 unit, 1 x NEBuffer 4, Biolabs) or *SwaI* (1 unit, 1 x buffer O, Fermentas). Reactions were incubated for 6 min (*PacI* and *Hpy188I* at 37  $^{\circ}$ C, *SwaI* reaction at 30  $^{\circ}$ C), then terminated by the addition of EDTA to 20 mM. The reactions and 1 kb labeled DNA marker (GeneRuler<sup>TM</sup> 1 kb ladder, 250-10,000 bp, Fermentas, labeled by [ $\gamma$ - $^{32}$ P]ATP as above described above) were fractionated by 1.2% agarose gel electrophoresis in TAE buffer, after which the gel was dried (model 583, BIO-RAD) and exposed overnight at -80  $^{\circ}$ C (FUJI medical X-RAY film), with intensifying screen.

#### **Long PCR and mtDNA sequencing**

The coding region of the mitochondrial genome was amplified in three overlapping fragments (each about 5.5 kb in size) by long-PCR (LongRange PCR kit, Qiagen), using partially purified mtDNA as template. The cycling conditions were: 93  $^{\circ}$ C, 3 min (initial denaturation); then 35 cycles of 93  $^{\circ}$ C, 15 s (denaturation); 50  $^{\circ}$ C, 30 s (annealing); 60  $^{\circ}$ C, 6 min (extension), with final extension at 60  $^{\circ}$ C for 10 min. Each PCR product was verified by 0.8% (w/v) agarose gel electrophoresis, then purified over mini-spin columns and used as templates for cycle sequencing using primers as indicated (Table S2). The mtDNA fragments were sequenced in both directions using Big Dye v3.1 chemistry and a 3130xl genetic analyzer (Applied Biosystems), with primer sequences as listed in Table S2. The sequences were aligned manually in win\_serialcloner1-3 (Serial Basics), then analyzed using the phred/phrap/consed package (GORDON *et al.* 1998). Each deviation from the reference sequence was confirmed by a second PCR and sequencing reaction. The NCR and its flanking sequences were sequenced separately, including the portion of the SSU rRNA not already covered by sequencing of coding region fragment 3.

For sequencing of the NCR, repeat arrays I and II, plus their flanking regions, were amplified from mtDNA template in separate, overlapping PCR reactions, then analyzed by a combination of cloning of restriction fragments and sequencing with overlapping primers, as indicated below. In general, at least three independent PCR reactions and over 200 clones were analyzed to infer the sequence of each sub-region from each strain analyzed. Nucleotide differences found only in single clones were assumed to represent mutations arising during PCR/cloning, but might also represent low-level

heteroplasmy. PCR used an initial denaturation step at 93 °C for 3 min, followed by 35 cycles of 93 °C for 15 s, 42 °C for 30 sec, 60 °C for 1-3 min depending on the length of the desired product, with a final extension at 60 °C for 10 min. PCR products were purified by gel electrophoresis (GeneJet gel extraction kit, Fermentas). The 'left' end of the NCR, between SSU rRNA and repeat array I, plus the short region of the SSU rRNA gene not already covered by sequencing of coding region fragment 3, was inferred by direct sequencing of the product amplified with primer pair Dm14428F/Dm17556R, using overlapping primers Dm14428F, Dm14570F, Dm14721F and Dm14787R. The PCR for type I repeats, which also confirmed the reverse-strand portion of the flanking region and start of the SSU rRNA gene, was performed using primer pair (Dm14721F and Dm17556R). After gel purification, the product was digested with *SspI* (1 X buffer G, Fermentas) or *PacI* at 37 °C overnight, then ligated into plasmid vector pNEB193 (New England Biolabs), which had been digested, respectively, with *SmlI* (*PmeI*, Fermentas) at 30 °C or *PacI* (New England Biolabs) at 37 °C, then dephosphorylated with CIAP (Fermentas) and purified by gel electrophoresis. The order of repeat I elements was inferred from overlaps of the restriction sites used for cloning (see Fig. S4F). It was further confirmed by PCR using primer pair Dm15578F/Dm17295R, and an elongation time of 90 s, which generated a mixture of 3 fragments of approximately 330, 700 and 1100 bp, which were independently cloned and sequenced. The region between repeat array I and repeat array II was amplified using PCR primer pairs Dm15578F/Dm17556R and Dm15578F/Dm17833R, and sequenced using unique sequencing primers covering this region on both strands (Table S2). Repeat array II was amplified by four different primer pairs which, under varying extension times, generate products of different sizes (see Fig. S4G). These were independently cloned and sequenced, to infer the final order of repeat II elements, which are very similar. The primer pairs used for repeat array II were: Dm15578F/Dm17833R, Dm17556F/Dm18026R, Dm17717F/Dm17833R, and Dm18933F/Dm225R. PCR products were cloned into pCR4 vector (TA Cloning Kit, Invitrogen) after gel purification, and sequenced using universal M13 forward and reverse primers. The shortest product from primer pair Dm15578F/Dm17833R allowed unambiguous assignment of the first portion of the 'first' copy of repeat II (the one closest to the repeat I array). The next shortest product from this primer pair extends into the second copy of repeat II, allowing full assignment of the first copy and the junction with the second. Similarly, the two shortest products from primer pair Dm18933F/Dm225R allow unambiguous assignment of the final copy of repeat II (the one closest to the tRNA<sup>lle</sup> gene), as well as the 'right' end of the NCR between repeat array II and tRNA<sup>lle</sup>, extending into the coding region. The various products from the two other primer pairs allow unambiguous assignment of the sequence and order of the remaining repeat II elements. All sequences were assembled using win\_serialcloner1-3.

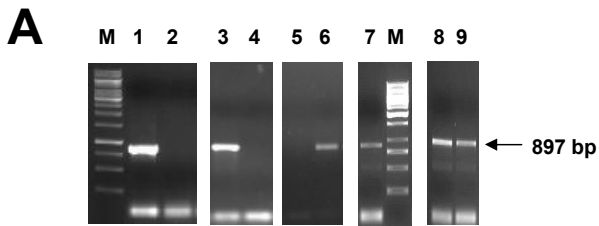

M – Marker  
 1, 9 – BER1  
 2 – KSA2  
 3 – Oregon R-C  
 4 – M2  
 5 – BS1  
 6 – QI2  
 7 – CO3  
 8 – Reids 1

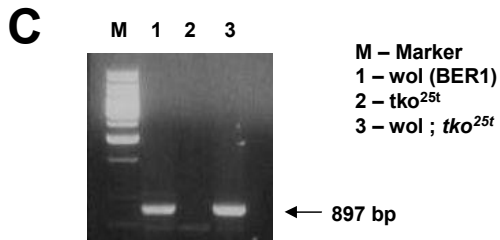

M – Marker  
 1 – wol (BER1)  
 2 – *tko*<sup>25t</sup>  
 3 – wol ; *tko*<sup>25t</sup>

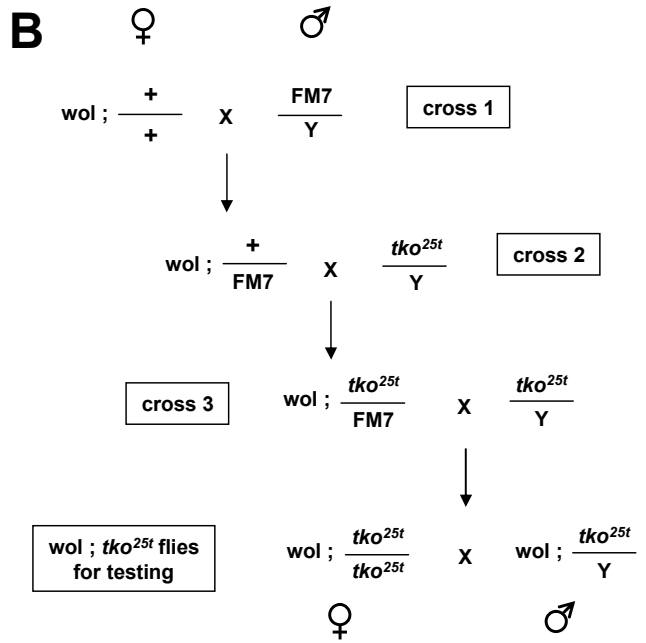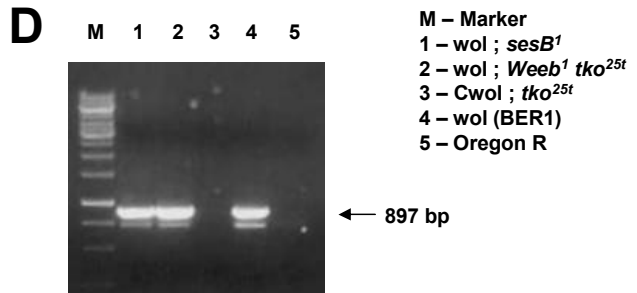

M – Marker  
 1 – wol ; *sesB*<sup>1</sup>  
 2 – wol ; *Weeb*<sup>1</sup> *tko*<sup>25t</sup>  
 3 – Cwol ; *tko*<sup>25t</sup>  
 4 – wol (BER1)  
 5 – Oregon R

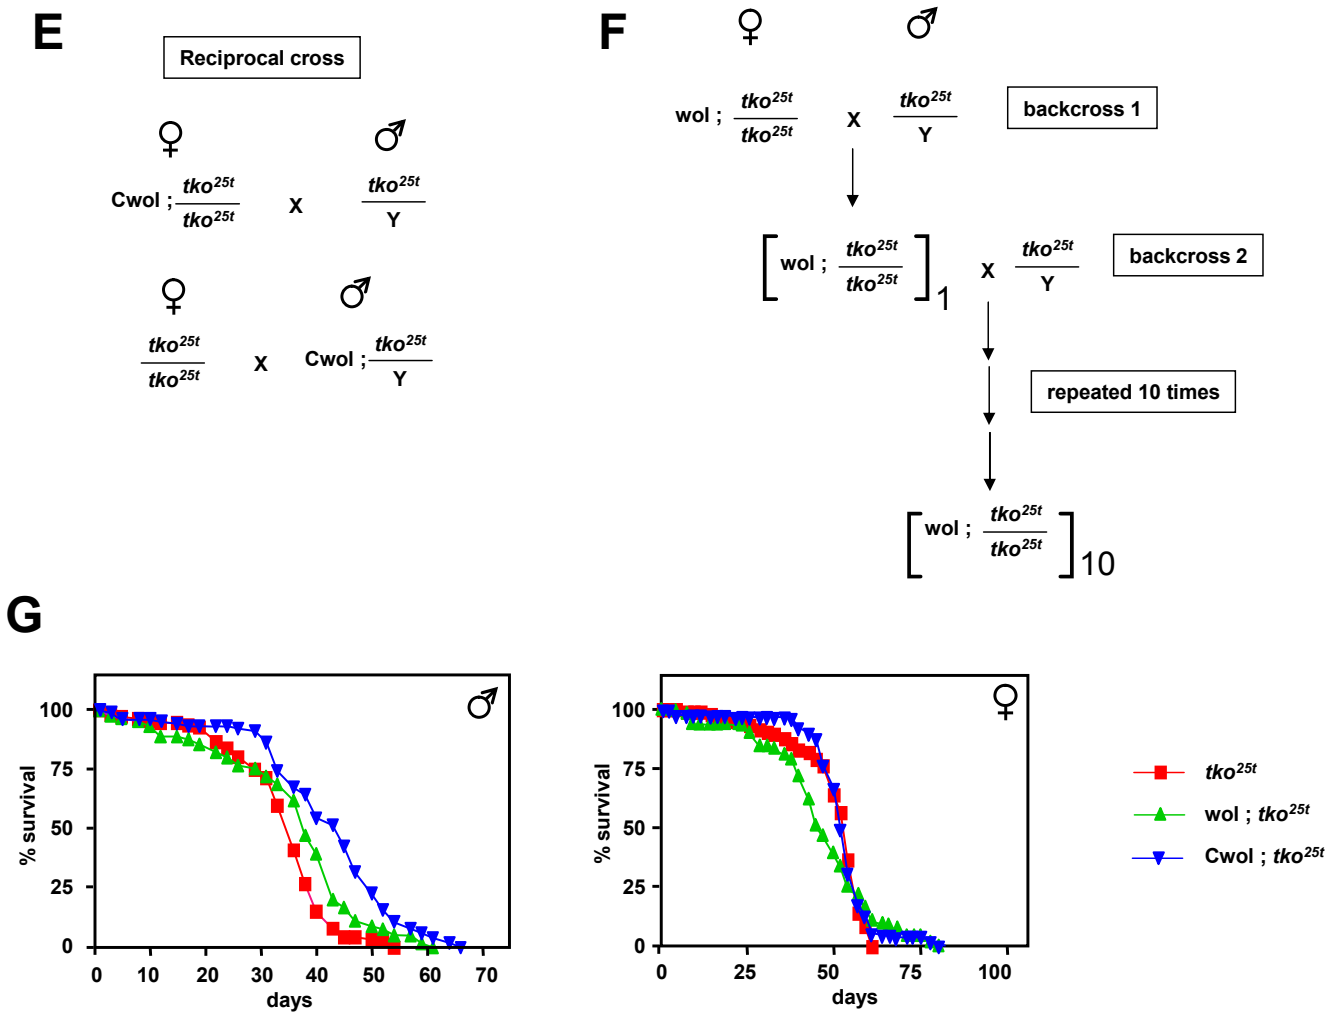

**Figure S1** Creation and phenotypic characterization of cybrid  $tko^{25t}$  and  $sesB^1$  flies. (A) Representative gels of PCR products obtained using the *Wolbachia* 16S rRNA gene primers on genomic DNA of single individuals from the wild-type strains indicated. Gels run in parallel using the same marker ladder. Multiple individuals from these strains gave consistent findings. Infected strains BER1, Oregon R-C, Q12 and CO3 were maintained in quarantine and females were crossed into the  $tko^{25t}$  background using the crossing scheme shown in (B). Experimental crosses to test the effects of *Wolbachia* cytoplasm on the  $tko^{25t}$  phenotype used the *Wolbachia*-infected progeny from cross 3 (i.e. lacking the FM7 balancer), which were also maintained subsequently as both balanced and homozygous stocks. The presence of *Wolbachia* cytoplasm is denoted by wol. The use of the X-chromosome balancer excludes any suppressor effects that may be linked to *tko* itself, such as the segmental duplication studied previously (KEMPPAINEN *et al.* 2009). (C) The presence of *Wolbachia* from strain BER1 after introgressing its cytoplasm into the  $tko^{25t}$  nuclear background was confirmed by PCR, with template genomic DNAs as indicated. (D) *Wolbachia* was introduced into the  $sesB^1$  background by an identical strategy, and its presence confirmed by PCR, as shown. Its removal from the infected  $tko^{25t}$  line by tetracycline treatment (Cwol) was confirmed similarly, and by PCR with universal bacterial 16S rRNA gene primers (Table S2) which also gave no product. wol ; *Weeb*<sup>1</sup>  $tko^{25t}$  – *Wolbachia*-infected *Weeble*<sup>1</sup>  $tko^{25t}$  suppressor strain (KEMPPAINEN *et al.* 2009). (E) Reciprocal crossing scheme to test inheritance pattern of the suppressor phenotype of the BER1-derived *Wolbachia*-free Cwol ;  $tko^{25t}$  line. The demonstration of strictly maternal inheritance of the suppressor (Fig. 1D) rules out any significant contribution from nuclear DNA. (F) Backcrossing scheme to confirm the cytoplasmic inheritance of  $tko^{25t}$  suppression in the *Wolbachia*-infected strain BER1 (denoted wol). Note that this back-crossing scheme was also used to test other cytoplasmic suppressors (Fig. 4), producing identical results for four different suppressors, again consistent with the suppressor determinant being purely cytoplasmic. (G) Lifespan curves for flies of the genotypes indicated. The curves for *Wolbachia*-infected (wol) and cured (Cwol)  $tko^{25t}$  males in the presence of BER1 mtDNA, after backcrossing for 10 generations, were significantly different (median survival of 43 d) from  $tko^{25t}$  males in the original (Oregon R-related) mtDNA background (median lifespan 31 d),  $p < 0.0001$ , log rank test). Because the flies are backcrossed to the same nuclear background, the differences are strictly attributable to the cytoplasmic genotype. Note that  $tko^{25t}$  flies have a much shorter lifespan than wild-type Oregon R flies tested in our laboratory (SANZ *et al.* 2010a).

**A**

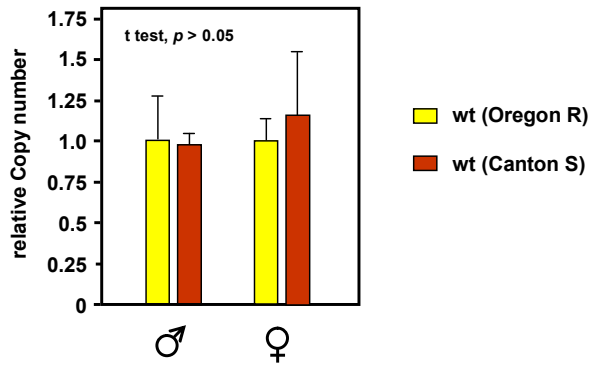

**B**

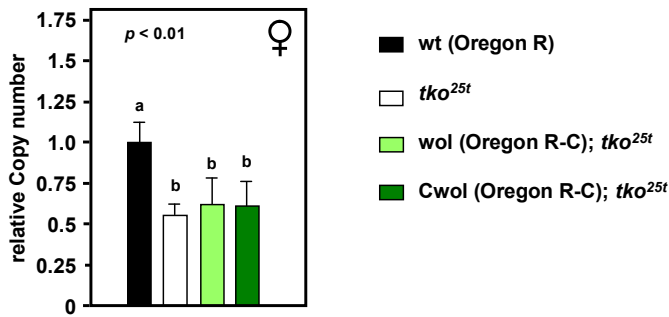

**C**

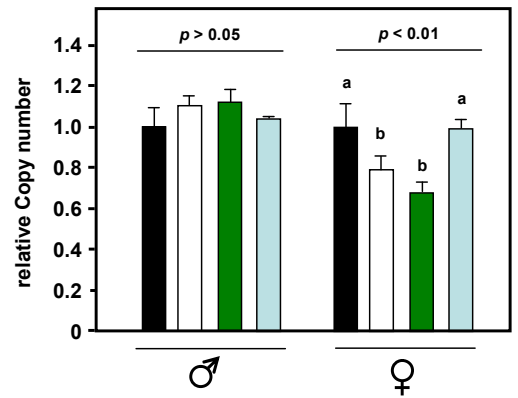

mtDNA ; nDNA

- Oregon R ; Oregon R (wt)
- Oregon R\* ; *tko<sup>25t</sup>* (original strain)
- Oregon R-C ; *tko<sup>25t</sup>*
- BER1 ; Oregon R (wt)

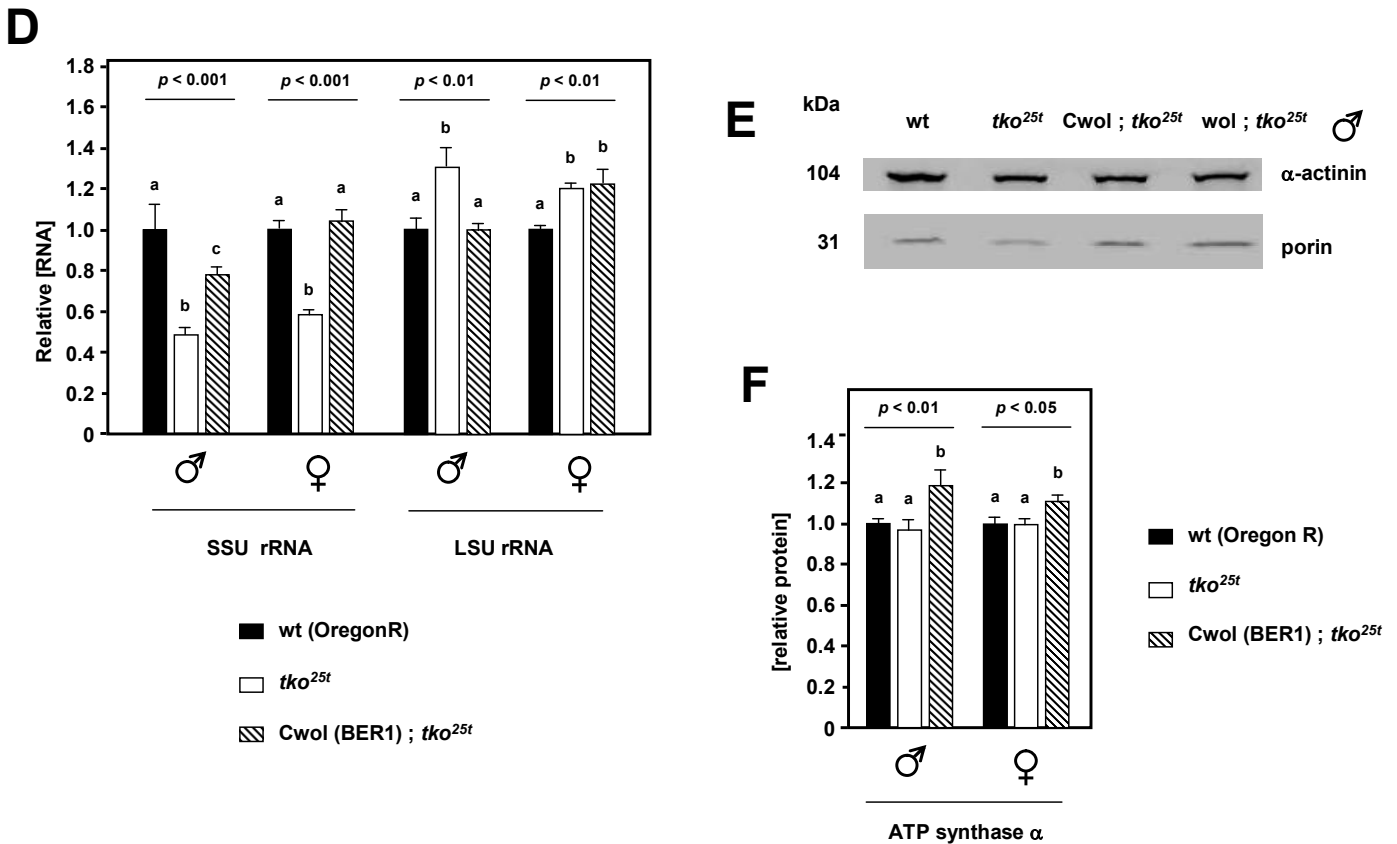

**Figure S2** Molecular correlates of partial suppression of *tko*<sup>25t</sup> by the suppressor mtDNA backgrounds. (A) Supplementary data to Fig. 2D: copy number of mtDNA in two different wild-type strains is similar. Copy number, relative to 18S rDNA, means  $\pm$  SD, was normalized to that in Oregon R flies of the same sex. The copy number differences seen in *tko*<sup>25t</sup> flies in different backgrounds (Fig. 2D) are outside the range of variation due to strain background only. (B) Supplementary data to Fig. 2D: the copy number of mtDNA in female *tko*<sup>25t</sup> flies is significantly lower than in wild-type flies also in a second non-suppressor mtDNA background (Oregon R-C). Data from first two columns reproduced from Fig.2D (experiments were carried out in parallel). (C) Further supplementary data to Fig. 2D: mtDNA copy number is not altered by BER1 mtDNA in a wild-type nuclear background. a, b denote significantly different data classes. Oregon R\* denotes the mtDNA of the original *tko*<sup>25t</sup> strain, whose sequence is very similar (but not identical) to Oregon R or Oregon R-C (Table S1). (D) Supplementary data to Fig. 2E: levels of mitochondrial SSU and LSU rRNA levels in flies of the indicated genotypes relative to the *mRpl32* mRNA standard, means  $\pm$  SD, normalized to the values in wild-type Oregon R flies of the given sex. The same data were used to compute the SSU/LSU ratios plotted in Fig. 2E. The decreased ratio of SSU to LSU rRNA in *tko*<sup>25t</sup> flies consists of a decrease in SSU rRNA combined with a small, perhaps compensatory increase in that of LSU rRNA, as reported previously (KEMPPAINEN *et al.* 2009). (E) Representative Western blot of protein extracts from males flies of the indicated genotype, probed for porin (mitochondrial outer membrane marker) and for  $\alpha$ -actinin (cytosolic loading control). The global amount of mitochondria, as measured by this assay, is decreased in the presence of the *tko*<sup>25t</sup> mutation in the original (Oregon R-related) mtDNA background, but restored to wild-type levels in the BER1 background, whether *Wolbachia* are present (wol) or absent (Cwol). The summary data of Fig. 2F are compiled from densitometry of this and equivalent blots. (F) Levels of a representative subunit of complex V (ATP synthase, subunit  $\alpha$ ), based on densitometry of Western blots, normalized against a cytosolic loading control ( $\alpha$ -actinin). In all panels a and b denote significantly different data classes (Newman-Keuls test,  $p < 0.05$ , based on ANOVA,  $p$  values as indicated, each sex and, where appropriate, each gene considered separately).

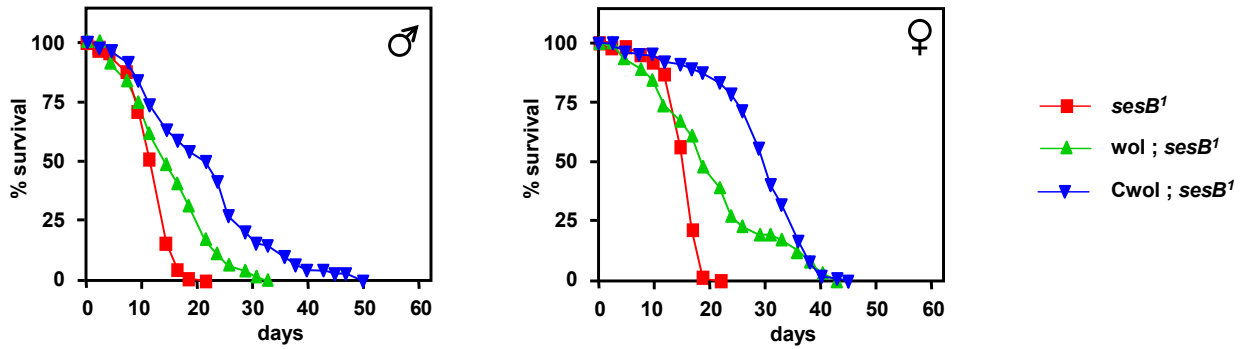

**Figure S3** BER1 strain mtDNA increases the lifespan of *sesB*<sup>1</sup> flies. Lifespan curves for flies of the genotypes indicated. For both sexes, the curves for *wol* (BER1); *sesB*<sup>1</sup> and *Cwol* (BER1) ; *sesB*<sup>1</sup> (median survival of 17, 19 d, respectively, for males, 31 and 26 d for females) were significantly different from *sesB*<sup>1</sup> flies of the same sex (median survival 10 d for males, 15 d for females,  $p < 0.0001$ , log rank test, in all cases). Since the flies are backcrossed to the same nuclear background, the differences are strictly attributable to the cytoplasmic genotype. BER1 mtDNA thus mitigates the age-related degeneration of *sesB*<sup>1</sup> adults, even though it does not modify the *sesB*<sup>1</sup> developmental phenotype.



**A**

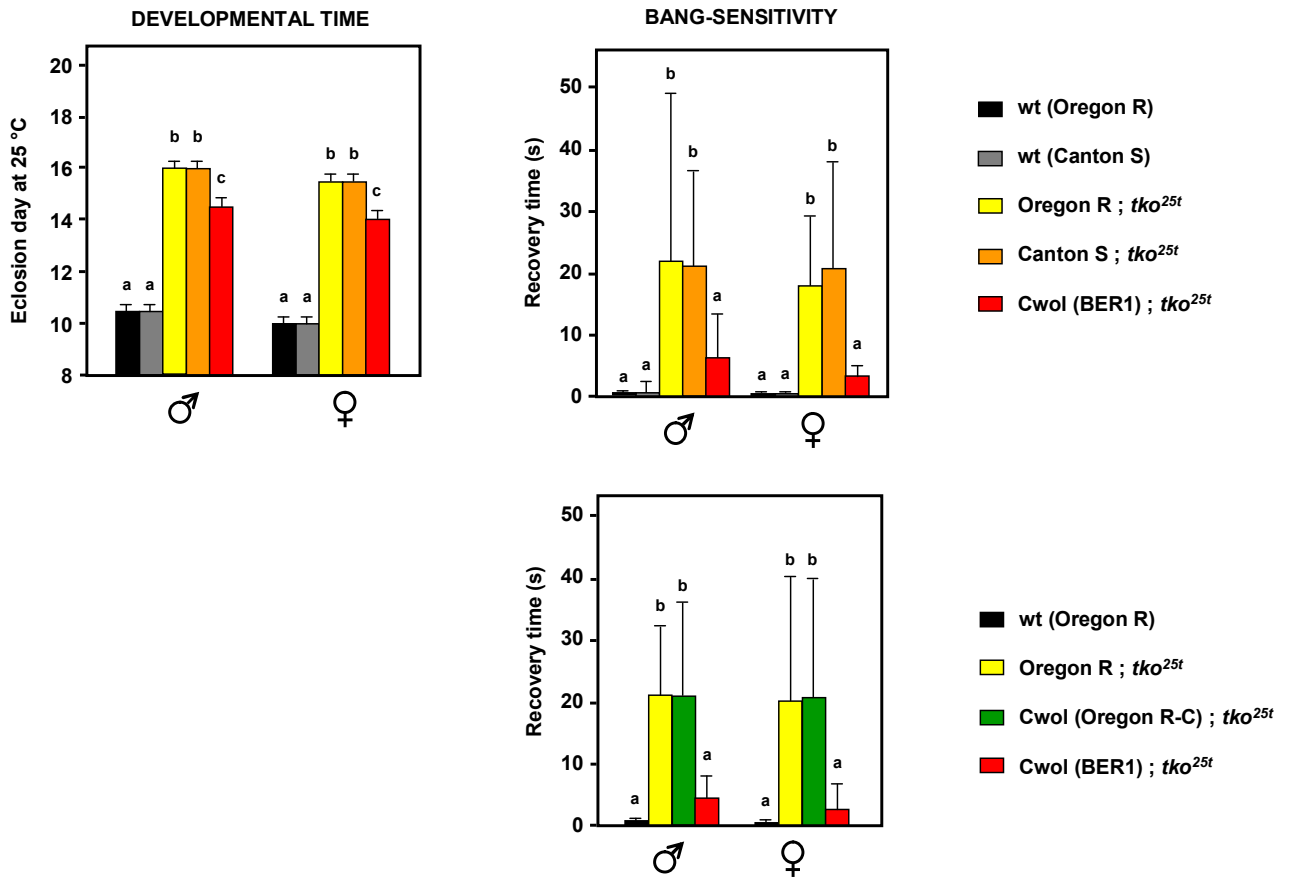

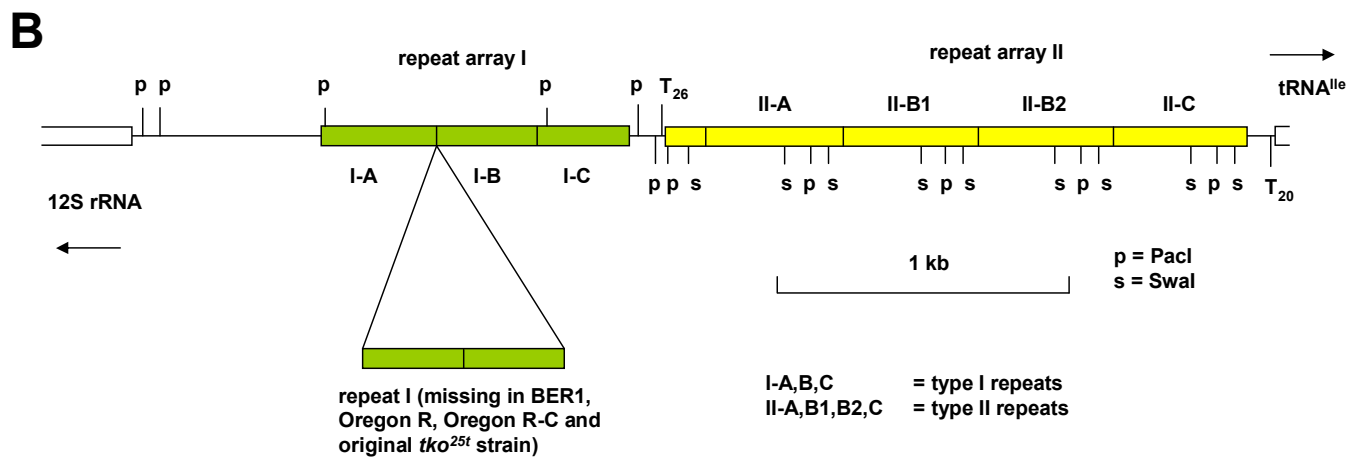

**C**

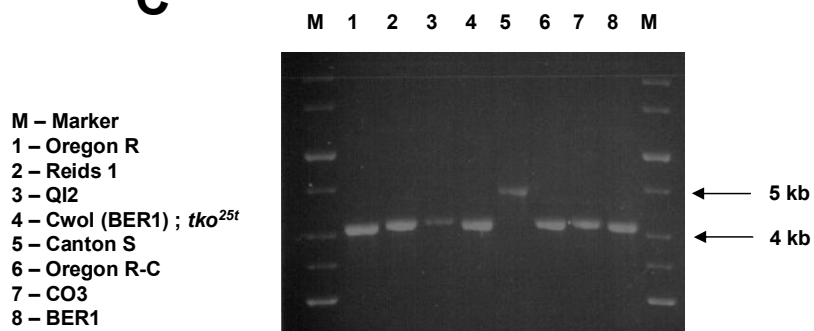

**D**

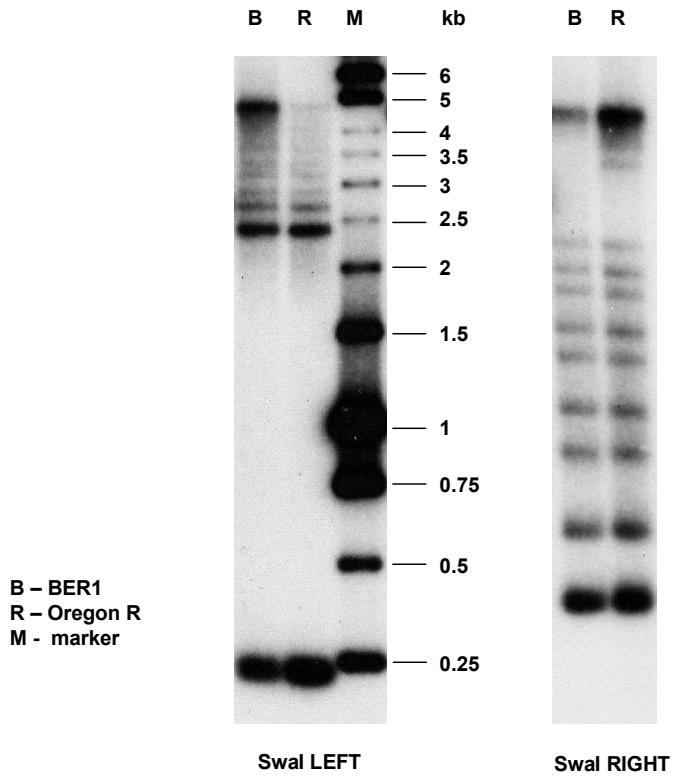

**E**

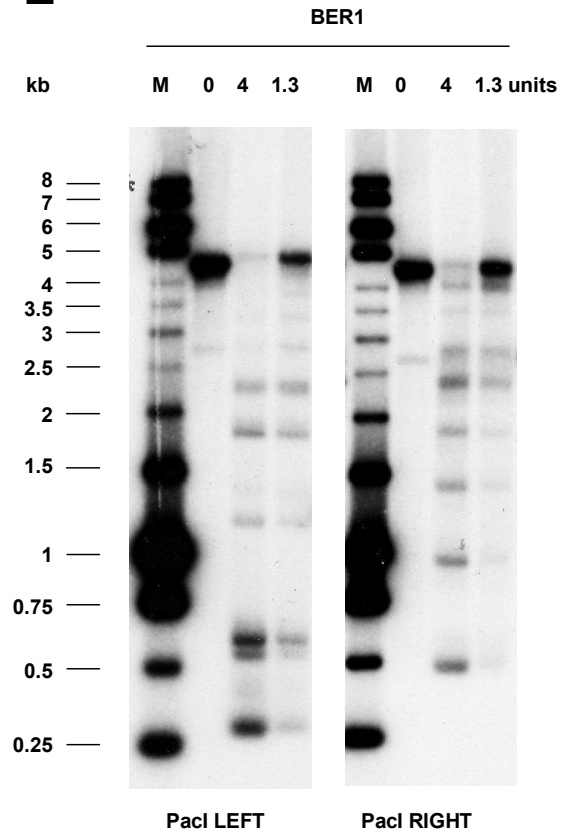

**F****type I repeats**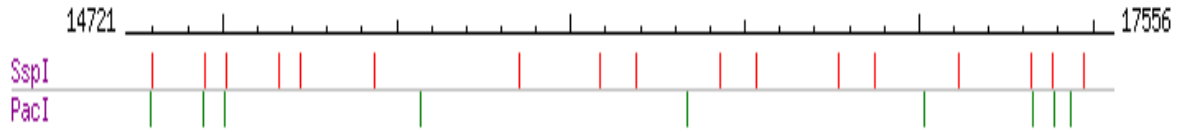**G****type II repeats**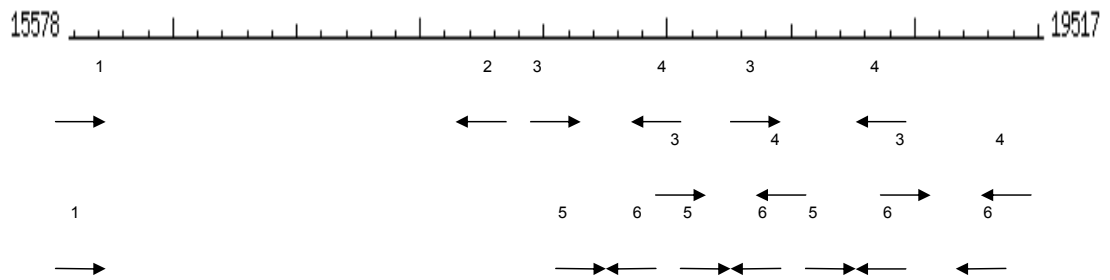

# H

Black = Refseq (NCBI accession NC\_001709)  
Blue = tk025t (original mtDNA background, NCBI accession JQ686693)  
Red = BER1 (NCBI accession JQ686694)  
turquoise background = differences from Refseq; numbering as Refseq

```
14917 ATTTTATTTTGGATTTTATTATTAATTAATAATTAATAATTTTATAAAAAATAATTTTAAAGAAAAATAAAATTAATTTAATTAATATTAATAA
ATTTTATTTTGGATTTTATTATTAATTAATAATTAATAATTTTATAAAAAATAATTTTAAAGAAAAATAAAATTAATTTAATTAATATTAATAA
CTTTTATTTTATTATTTATTAATTAATAATTAATAATTTTATAAAAAATAATTTTAAAGAAAAATAAAATTAATTTAATTAATATTAATAA

15017 ATAATTTAATTTTATAATAAAAATTTTATCATATTATAATAATATAAAAATTTTATAAATTTATTTTAAATTTTACAAAATTTTAAAATTTTATTT
ATAATTTAATTTTATAATAAAAATTTTATCATATTATAATAATATAAAAATTTTATAAATTTATTTTAAATTTTACAAAATTTTAAAATTTTATTT
ATAATTTAATTTTATAATAAAAATTTTATCATATTATAATAATATAAAAATTTTATAAATTTATTTTAAATTTTACAAAATTTTAAAATTTTATTT

15117 TTTTAAAAAATAAATTTTAAACAAAAAATAATTTATCAAAATTTAATAATAAATAAATTTAATTTAAAAATTAATAAATTTTAAATTTTACACTTT
TTTTAAAAAATAAATTTTAAACAAAAAATAATTTATCAAAATTTAATAATAAATAAATTTAATTTAAAAATTAATAAATTTTAAATTTTACACTTT
TTTTAAAAAATAAATTTTAAACAAAAAATAATTTATCAAAATTTAATAATAAATAAATTTAATTTAAAAATTAATAAATTTTAAATTTTACACTTT

15217 TTTAAAAATATTTTAAAAA--AAAAATTTTAAAAAATTTTAAAAAATTTTAAAAAATTTAAAAATTTAAGATTAATTTCTTTAAATG
TTTTAAAAATATTTTAAAAA--AAAAATTTTAAAAAATTTTAAAAAATTTTAAAAAATTTAAGATTAATTTCTTTAAATG
TTTTAAAAATATTTTAAAAA--AAAAATTTTAAAAAATTTTAAAAAATTTTAAAAAATTTAAGATTAATTTCTTTAAATG

15315 ACTAAAAAAA--TTTTTTTTTAAAGTATTTTAAACTTTTTTTTACAATTTTAAAAAATATAAATAAATTTAAAAA--TTTTTTTTTTAA
ACTAAAAAAA--TTTTTTTTTAAAGTATTTTAAACTTTTTTTTACAATTTTAAAAAATATAAATAAATTTAAAAA--TTTTTTTTTTAA
ACTAAAAAAA--TTTTTTTTTAAAGTATTTTAAACTTTTTTTTACAATTTTAAAAAATATAAATAAATTTAAAAA--TTTTTTTTTTAA

15412 AAAAAATGAAATTTATTTATAAAAAATTTTTTTT-ACAAAAATGAAATTTAATCTATTAAAAA--ATTATTAATTTTATGAATAAATAAAA
AAAAAATGAAATTTATTTATAAAAAATTTTTTTT-ACAAAAATGAAATTTAATCTATTAAAAA--ATTATTAATTTTATGAATAAATAAAA
AAAAAATGAAATTTATTTATAAAAAATTTTTTTT-ACAAAAATGAAATTTAATCTATTAAAAA--ATTATTAATTTTATGAATAAATAAAA

15510 AAAGTAATAAATTTATTAATAAATCAATATATATATAATAAATAAATTTGATTATTAATTAATTAATTAATTAATTAATTAATTAATTAATTAATTTA
AAAGTAATAAATTTATTAATAAATCAATATATATATAATAAATAAATTTGATTATTAATTAATTAATTAATTAATTAATTAATTAATTAATTTA
AAAGTAATAAATTTATTAATAAATCAATATATATATAATAAATAAATTTGATTATTAATTAATTAATTAATTAATTAATTAATTAATTTA
```

15610 ATCACTAAATCTGAAATAATTA--TATATATATATATATATATATATATATATATACATATATATATATATATATATACATAAAATAAAATAAAATAAAATTTATTC  
ATCACTAAATCTGAAATAAT AAT TATATAATTATATAT ----- ATATATATATATACACACACATAAAATAAAATAAAATAAAATTTATTC  
ATCACTAAATCTGAAATAATTAAT TATATATATATATATATATATATATATATATATATATATATATATAATAAAATAAAATAAAATAAAATTTATTC

15708 CCCTATTCATAAATTTATTATATAAATTAACCTTAAAAAGTATTTTTTTTTTAAAAAAA--TTATTTATTAATTTACTTAATAAACCTATTTTTATAAT  
CCCTATTCATAAATTTATTATATAAATTAACCTTAAAAAGTATTTTTTTTTTAAAAAAA TTATTTATTAATTTACTTAATAAACCTATTTTTATAAT  
CCCTATTTATAAATTTATTATATAAATTAACCTTAAAAAGTATTTTTTTTTTAAAAAAA TTATTTATTAATTTACTTAATAAACCTATTTTTATAAT

15807 AAATTATTTTATAAATAAAATTTATTTAAAAAATTAATAAGAAATATTTTTATTATAAATAAAATAAAATAAATTTTAAAAAATTC AATTTATA--TT  
AAATTATTTTATAAATAAAATTTATTTAAAAAATTAATAAGAAATATTTTTATTATAAATAAAATAAAATAAATTTTAAAAAATTTAATTTATA--TT  
AAATTATTTTATAAATAAAATTTATTTAAAAAATTAATAAGAAATATTTTTATTATAAATAAAATAAAATAAATTTTAAAAAATTTAATTTATAATT

15905 TATATATATATATATATATATA-----ATTTAATTTT-CAATTAAA-TTATATAAATATAATAAATAAATTTATTTAATCACTAAATCTGAAA  
TATATATATATATATATA-----ATTTAATTTT-CAATTAAA-TTATATAAATATAATAAATAAATTTATTTAATCACTAAATCTGAAA  
TATATATATATATATATATATA TATATATA--ATTTTAAATTTTCGATGAAA-TTATGTAAATATAATAAATAAATTTTATTTAATCACTAAATCTGAAA

15993 TAATTAATTATATATATATATATATATA--TAAAAAATGAAAATAAATTTATCCCCCTATTCATAAATTTATTGTATAATTAACCTTAAAAATATT  
TAATTAATTATATATATATATATATATA AAT AAAAAATGAAAATAAATTTATCCCCCTATTCATAAATTTATTGTATAATTAACCTTAAAAATATT  
TAATTAATTATATATATATATATATATA--TA--TAAATGAAAATAAATTTATCCCCCTATTCATAAATTTATTGTATAATTAACCTTAAAAATATT

16091 TTTTTTTAAAAAAAATGATTTATTAATTTACTTAATAAACTATTTTTATAATAAATTTATTTTATAAATAAATAAATTTTAAATAATTAATAAAAA-  
TTTTTTTTAAAAAAAATGATTTATTAATTTACTTAATAAACTATTTTTATAATAAATTTATTTTATAAATAAATAAATTTTAAATAATTAATAAAAA-  
TTTTTTTTAAAAAAAATTAATTTATTAATTTACTTAATAAACTATTTTTATAATAAATTTATTTTATG AATAAATAATTTTAAATAATTTATAAAAA-

16190 TATTTTAAATATAATAAATAAATTTAAATGATTTTTTA-TAAAAATCAATTCATATATTTATATATATATAC-----ATATAATTTAATTTCAATTAA  
TATTTTAAATATAATAAATAAATTTAAATGATTTTTTA-TAAAAATCAATTCATATATTTATATATATATATA TATATATATATAAATTTAATTTTC -----  
TATTTTAAATATAATAAATAAATTTAAATGATTTTTTATTAATTAATTAATTCATATATTTATATATATATATA TATATATATATAAATTTAATTTTC -----

16283 ATTATATAAGTATAATAAATAAATTTATTTTAACTCACTAAATCTGAATTAATTAATTGTATATATATATATATATATATATATATATATGTAATAAATAAAT  
-----  
-----

16383 TTATTCCCCCTATTCATAAAATTTATTATATAAATTTAAACCTTAAAAAAATATTTTTTTTAAAAAAAATTTATTATTAAATTATACTTAATAAACTATTT  
16483 TTATAATAAAATTTATTTATAAAATAAAATTTAAATAAATAAAGAAATATTTTTATATAATAAAAATTTAAATAATTTTAAAAAATTCATTT  
16583 ATATTTATATATATATATATATATAAATTTTAAATTTCAATTAATATATAAAATAATAAAAAATTTATTTAATCACTAAATCTGAAATAATTAA  
16683 TTATATATATATATATATATAAAAAAATGAAAAATAAATTTATTCCCCCTATTCATAAAATTTATTTGTATAAATTTAAACCTTAAAAAATTTTTTTTTTAA  
16783 AAAAAAATGATTTATTAATTTATACTTAATAAACTATTTTATAAATAAATTTTATAAAATAAAATTTTAAATAATTAATAAAAAATTTTAAAT  
16883 ATAAATAAAATTTAAATGATTTTTTATAAAATTCATTCATATATTTATATATATATATACATATAAATTTTCAATTTAAATATATAAGTATAATA  
AATTAATTTATAAGTATAATA  
AATTAAATTATATAAGTATAATA  
16983 AAATAATTTATTTAATCACTAAATCTGAATTAATTAATTTGTATATATATATATATATATATATGTAAATGAAAATAAAATTTATTCCCCCTATTCAT  
AAATAATTTATTTAATCACTAAATCTGAATTAATTAATTTGTATATATATATATATATATATATTTAAATGAAAATAAAATTTATTCCCCCTATTCAT  
AAATAATTTATTTAATCACTAAATCTGAATTAATTAATTTGTATATATATATATATATATTTAAATGAAAATAAAATTTATTCCCCCTATTCAT  
17083 AAATTTA-----TTATATAAATTTAAACCTTAAAAAAATATTTTTTTTTTAAAAAAAATTTATTATTAAATTTATACTTAATAAACT  
AAATTTATTCCCCCTATTCATAAAATTTATTTATAAATTTAAACCTTAAAAAAATTTTTTTTTTAAAAAAAATTTATTATTAAATTTATACTTAATAAACT  
AAATTTA-----TTATATAAATTTAAATCTTAAAAATTTTTTTTTTAAAAAAAATTTATTATTAAATTTATACTTAATAAACT





17946 TAATATATATATATATATAGAAAAATTAATTTATTTAAATAATTTAATAAATAATTTTTTAAAAATTTCTTAAATGTATTATTTTTATAAAAAATTTTAT  
TAATATATATATATATATAGAAAAATTAATTTATTTAAATAATTTAATAAATAATTTTTTAAAAATTTCTTAAATGTATTATTTTTATAAAAAATTTTAT  
TAATATATATATATATATAGAAAAATTAATTTATTTAAATAATTTAATAAATAATTTTTTAAAAATTTCTTAAATGTATTATTTTTATAAAAAATTTTAT

18046 ATAATAAAATCATGTTTTTTAAAAATAAACAAAAATTTTTAATAAATAAATTTTATAATGAAATATAATTTATTTATTTTCAATTTTTTAAAAAT  
ATAATAAAATCATGTTTTTTAAAAATAAACAAAAATTTTTAATAAATAAATTTTATAATGAAATATAATTTATTTATTTTCAATTTTTTAAAAAT  
ATAATAAAATCATGTTTTTTAAAAATAAACAAAAATTTTTAATAAATAAATTTTATAATGAAATATAATTTATTTATTTTCAATTTTTTAAAAAT

18146 TTTTAAAAAAAATAATTTTTTTTTAAAAAACTATATACTAATTATAAATTAATAGATATTTATATATATATAAATATTTAATATATTTATATATA  
TTTTAAAAAAAATAATTTTTTTTTAAAAAACTATATACTAATTATAAATTAATAGATATTTATATATATATAAATATTTAATATATTTATATATA  
TTTTAAAAAAAATAATTTTTTTTTAAAAAACTATATACTAATTATAAATTAATAGATATTTATATATATATAAATATTTAATATATTTATATATA

18246 T-CTAATAATTTAAATAAAAAATTTTAAATTTAAAAATGTAGATATAATTTATAAAAAATTTATATTCTCATATTTATTTATTTAATTTAATTTATAT  
T-CTAATAATTTAAATAAAAAATTTTAAATTTAAAAATGTAGATATAATTTATAAAAAATTTATATTCTCATATTTATTTATTTAATTTAATTTATAT  
TTCTAATAATTTAAATAAAAAATTTTAAATTTAAAAATGTAGATATAATTTATAAAAAATTTATATTCTCATATTTATTTATTTAATTTAATTTATAT

18345 AAATAATATAATGATTTAATTAATTATATATATTTATAAATTTATATATTTGAAATATTTATATAATATATATATATATAGAAAAATTAATTTAT  
AAATAATATAATGATTTAATTAATTATTTATATATTTATAAATTTATATATTTGAAATATTTATATAATATATATATATATAGAAAAATTAATTTAT  
AAATAATATAATGATTTAATTAATTATTTATATATTTATAAATTTATATATTTGAAATATTTATATAATATATATATATATAGAAAAATTAATTTAT

18445 TAAATAATTTAATATAAATTTTTTAAAAATTTCTTAAATGTATTATTTTATAAAAAATTTATATAAATAAATCATGTTTTTTAAAAATAAACAAAA  
TAAATAATTTAATATAAATTTTTTAAAAATTTCTTAAATGTATTATTTTATAAAAAATTTATATAAATAAATCATGTTTTTTAAAAATAAACAAAA  
TAAATAATTTAATATAAATTTTTTAAAAATTTCTTAAATGTATTATTTTATAAAAAATTTATATAAATAAATCATGTTTTTTAAAAATAAACAAAA

18545 AATTTTTAATAAATAAATTTTATAATGAAATATAAATTTATTTATTTTCAATTTTTTAAAAATTTTAAAAAAAATAATTTTTTTTTAAAAAAA  
AATTTTTAATAAATAAATTTTATAATGAAATATAAATTTATTTATTTTCAATTTTTTAAAAATTTTAAAAAAAATAATTTTTTTTTAAAAAAA  
AATTTTTAATAAATAAATTTTATAATGAAATATAAATTTATTTATTTTCAATTTTTTAAAAATTTTAAAAAAAATAATTTTTTTTTAAAAAAA

18645 CTATATACTAATTATAAATTAATAGATATTTATATATATATAAATATTTAATATATTATATATAT-CTAATAATTTAAATAAAAAATTTTAAATTTAA  
CTATATACTAATTATAAATTAATAGATATTTATATATATATAAATATTTAATATATTATATATAT-CTAATAATTTAAATAAAAAATTTTAAATTTAA  
CTATATACTAATTATAAATTAATAGATATTTATATATATATAAATATTTAATATATTATATATAT-CTAATAATTTAAATAAAAAATTTTAAATTTAA

18744 AAATGTAGATATAATTTATAAAAAATTTATATTCATATTTATTATTATTAATTTAATTTATATAAATAATATAATGATTTAATTAATTATTATATATT  
AAATGTAGATATAATTTATAAAAAATTTATATTCATATTTATTATTATTAATTTAATTTATATAAATAATATAATGATTTAATTAATTATTATATATT  
AAATGTAGATATAATTTATAAAAAATTTATATTCATATTTATTATTATTAATTTAATTTATATAAATAATATAATGATTTAATTAATTATTATATATT

18844 TATAAATTTATATATTATTGAATATTTATATAATATATATATATATATAGAAAAATTAATTTAATAATTTAATAAATTTTAAAAATTTCTT  
TATAAATTTATATATTATTGAATATTTATATAATATATATATATATATAGAAAAATTAATTTAATAATTTAATAAATTTTAAAAATTTCTT  
TATAAATTTATATATTATTGAATATTTATATAATATATATATATATAGAAAAATTAATTTAATAATTTAATAAATTTTAAAAATTTCTT

18944 AAATGTATTATTTTATAAAAAATTTATATAAATAATCATTTTTTTTTAAAAATAAACAAAAATTTTAATAAATAAATTTATAATGAAATATAA  
AAATGTATTATTTTATAAAAAATTTATATAAATAATCATTTTTTTTTAAAAATAAACAAAAATTTTAATAAATAAATTTATAATGAAATATAA  
AAATGTATTATTTTATAAAAAATTTATATAAATAATCATTTTTTTTTAAAAATAAACAAAAATTTTAATAAATAAATTTATAATGAAATATAA

19044 TTTATTATTTTTTCATTTTTTTA-AAAAAATTTTTTAAAAAATAATTTTTTTTTAAAAAATACTATATACTAATTATAAATTAATAGATATTATA  
TTTATTATTTTTTCATTTTTTTTAAAAAATACTATATACTAATTATAAATTAATAGATATTATA  
TTTATTATTTTTTCATTTTTTTTAAAAAATACTATATACTAATTATAAATTAATAGATATTATA

19143 TATATATAAATATTTAATAATATTATATATCTAATAATTTAATAAAAAATTTAAAAATTTAAAAATATAGATATAAATTTATAAAAAATTTATATCTC  
TATATATAAATATTTAATAATATTATATATCTAATAATTTAATAAAAAATTTAAAAATTTAAAAATGATAGATATAAATTTATAAAAAATTTATATCTC  
TATATATAAATATTTAATAATATTATATATCTAATAATTTAATAAAAAATTTAAAAATTTAAAAATGATAGATATAAATTTATAAAAAATTTATATCTC

19243 ATATTTATTTATTTAATTTAATTTATATAAATAATATAATGATTTAATTAATTATATATATTATAAATTTATATATTATTGAATATTTATATATAA  
ATATTTATTTATTTAATTTAATTTATATAAATAATATAATATTTAATTAATTTATATATTATAAATTTATATATTATTGAATATTTATATAA  
ATATTTATTTATTTAATTTAATTTATATAAATAATATAATATTTAATTAATTTATATATTATAAATTTATATATTATTGAATATTTATATAA

19343 TATATATATATATAGAAAAATAAATTTAATAAATTTTTCATAAAATTTAAAAAATTTCTTAAATGATTTAATAAAAAATTTACTTTTTAAAA  
TATATATATATATAGAAAAATAAATTTAATAAATTTTTCATAAAATTTAAAAAATTTCTTAAATGATTTAATAAAAAATTTACTTTTTAAAA  
TATATATATATATAGAAAAATAAATTTAATAAATTTTTCATAAAATTTAAAAAATTTCTTAAATGATTTAATAAAAAATTTACTTTTTAAAA

19443 AAAATAATTTAATTTTAAAAAATAGTAAATAAATAAAAAAAAAAAAAAAAAAA-ATGAAAATTATATTATT  
AAAATAATTTAATTTTAAAAAATAGTAAATAAATAAAAAAAAAAAAAAAAAAAATGAAAATTATATTATT  
AAAATAATTTAATTTTAAAAAATAGTAAATAAATAAAAAAAAAAAAAAAAAAA-ATGAAAATTATATTATT

**Figure S4** NCR structure and phenotypes conferred by mtDNAs of different *D. melanogaster* strains. (A) Phenotypic characterization of *tko*<sup>25t</sup> flies in the Canton S and Oregon R mtDNA backgrounds, as indicated showing both to be fully of the non-suppressor type. a, b and c denote significantly different data classes (Newman-Keuls test,  $p < 0.05$ , based on ANOVA,  $p < 0.001$ , each sex considered separately). (B) Summary map of the NCR of different strains, based on crude length determination of the NCR-containing long PCR product (DsmtD4s/ DsmtD4as) by agarose gel electrophoresis (C), restriction mapping (D,E) and DNA sequencing (F), and showing the restrictions sites used in mapping. All strains studied, apart from Canton S, were found to have the 'short' NCR morph (Panel C). Partial restriction digestion (D, E) and complete sequencing (F-H) revealed that this morph contains only three copies of repeat I, rather than the 5 seen in the 'long' morph of the reference sequence (Lewis *et al.* 1994). (D), (E) Neutral PAGE of the NCR-containing PCR product of strains BER1 and Oregon R, labeled as described in Supplementary Materials and Methods to create sub-fragments labeled at the right (tRNA-ile) or left (SSU rRNA) ends as indicated, then digested with the restriction enzymes shown (4 u, except where indicated), alongside labeled size markers. The separate sub-panels of (D) and (E) each represent sets of non-adjacent lanes from a single gel. (F, G) Sequencing strategy for the NCR, showing restriction sites in repeat array I used for cloning, and repeated priming sites for PCR in repeat array II. Primers are denoted as follows: 1 - Dm15578F, 2 - Dm17295R, 3 - Dm17556F, 4 - Dm18026, 5 - Dm17717F, 6 - Dm17833R (H) Aligned sequences of the NCR of suppressor strain BER1 and the original *tko*<sup>25t</sup> non-suppressor strain, numbered according to the reference sequence (Refseq) and color-coded as indicated. Gaps indicated by dashes.

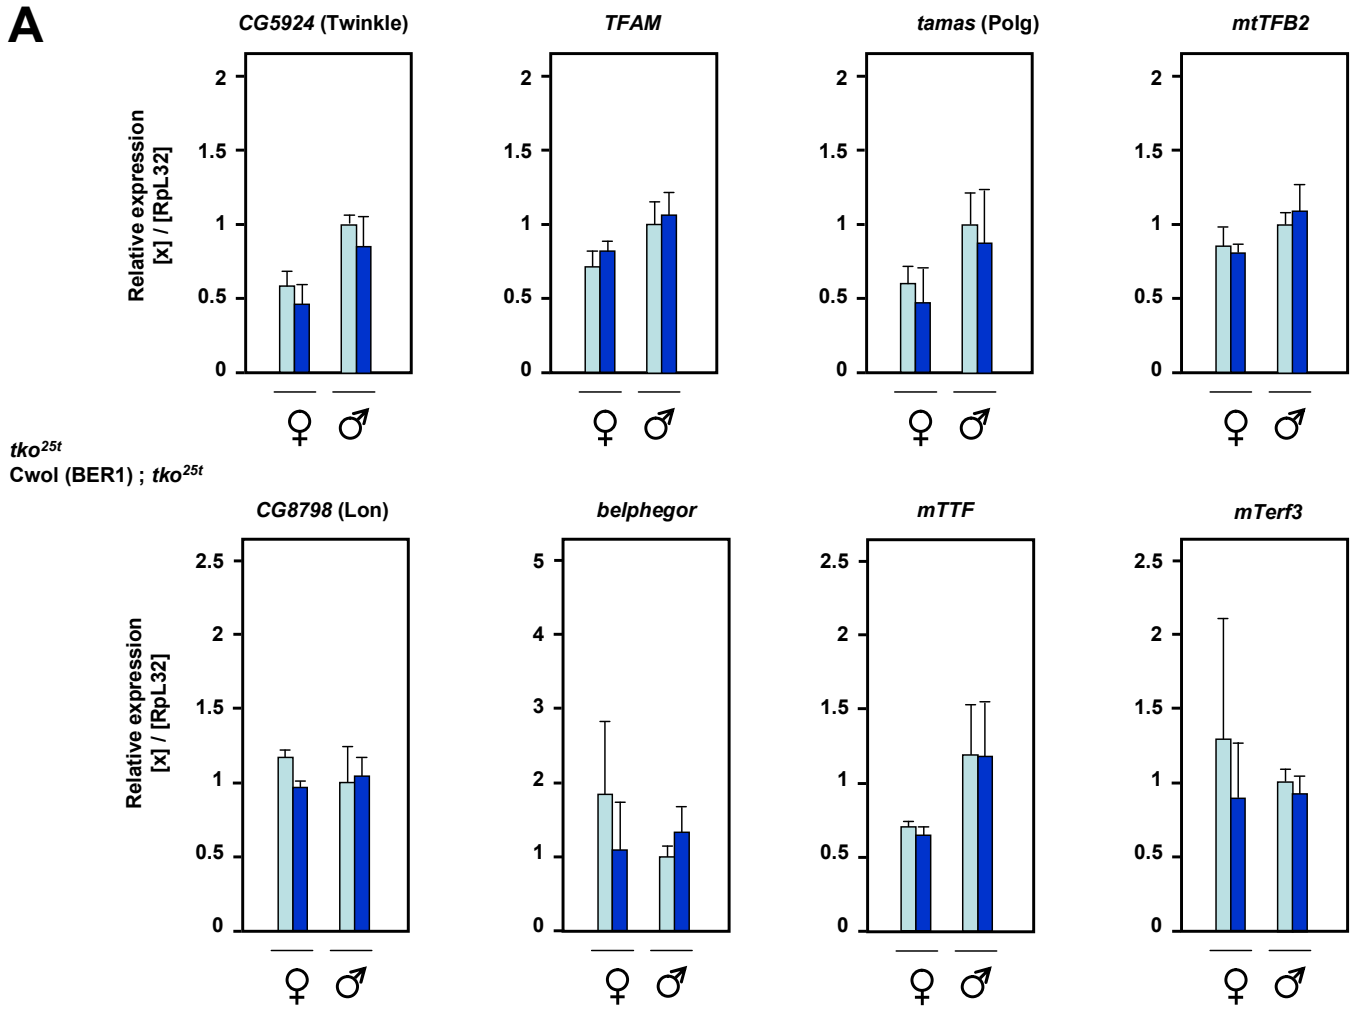

**B**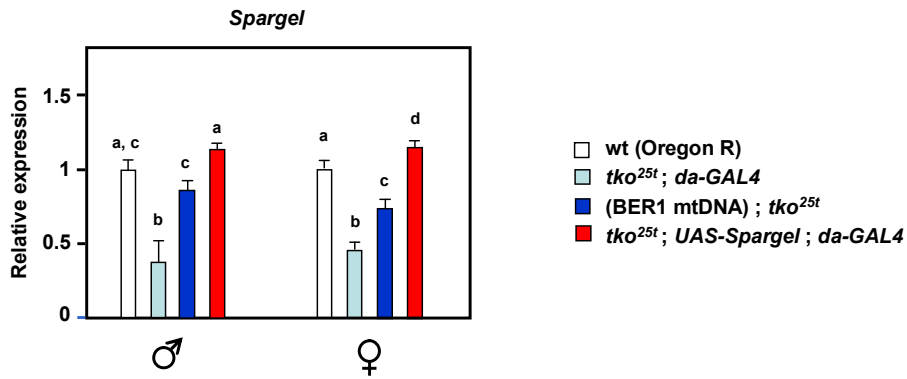

**Figure S5** Expression levels of genes with known or proposed roles in mtDNA metabolism in *tko*<sup>25t</sup> flies, in different mtDNA backgrounds. Q-RT-PCR of the indicated mRNAs, normalized to that of *RpL32* and then to the values for *tko*<sup>25t</sup> females in the original (Oregon R-related) strain background, in flies of the strains and sex indicated. (A) Despite varying expression levels in males versus females, there were no significant differences between *tko*<sup>25t</sup> flies of a given sex in the two mtDNA backgrounds tested (*t* test,  $p > 0.05$  in all cases). (B) Use of the *UAS-Spargel* transgene, in combination with the ubiquitous *da-GAL4* driver, over-rode the downregulation of *Spargel* in *tko*<sup>25t</sup> flies. a, b, c, d denote significantly different data classes (Newman-Keuls test,  $p < 0.05$ , based on ANOVA,  $p < 0.01$ )

Table S1 Sequence polymorphism in mtDNA coding region of suppressor and non-suppressor strains compared with Refseq

| Nucleotide change | Gene  | Coding change | BER1 | QI2 | CO3 | Reids-1 | <i>tko</i> <sup>25f</sup> (original) | Oregon R-C | Canton S | Oregon R |
|-------------------|-------|---------------|------|-----|-----|---------|--------------------------------------|------------|----------|----------|
| 671C>T            | ND2   | silent        | X    |     |     |         |                                      |            | X        |          |
| 710G>A            | ND2   | silent        | X    |     |     |         |                                      |            | X        |          |
| 735C>T            | ND2   | silent        | X    |     |     |         |                                      |            | X        |          |
| 791A>G            | ND2   | silent        | X    |     |     |         |                                      |            | X        |          |
| 838TA>AT          | ND2   | L>Y           | X    | X   | X   | X       | X                                    | X          | X        | X        |
| 1068A>C           | ND2   | I>L           | X    |     |     |         |                                      |            | X        |          |
| 1154T>C           | ND2   | silent        |      |     |     |         |                                      |            | X        |          |
| 1478G>A           | COI   | R>Q           |      |     |     |         | X                                    |            |          |          |
| 1512T>C           | COI   | silent        |      |     |     |         |                                      |            | X        |          |
| 1674G>A           | COI   | silent        | X    |     |     |         |                                      |            | X        |          |
| 1779A>T           | COI   | silent        | X    |     |     |         |                                      |            | X        |          |
| 1836A>G           | COI   | silent        | X    |     |     |         |                                      |            | X        |          |
| 1861T>C           | COI   | silent        | X    |     |     |         |                                      |            | X        |          |
| 1917A>G           | COI   | silent        | X    |     |     |         |                                      |            |          |          |
| 1929G>A           | COI   | silent        | X    |     |     |         |                                      |            | X        |          |
| 2071C>T           | COI   | silent        | X    |     |     |         |                                      |            |          |          |
| 2136G>A           | COI   | silent        |      | X   | X   |         |                                      |            |          |          |
| 2160T>C           | COI   | silent        | X    |     |     |         |                                      |            | X        |          |
| 2187C>T           | COI   | silent        | X    |     |     |         |                                      |            | X        |          |
| 2661C>T           | COI   | silent        | X    |     |     |         |                                      |            |          |          |
| 2863C>T           | COI   | silent        | X    | X   | X   | X       | X                                    | X          | X        | X        |
| 2928A>T           | COI   | Q>H           |      |     |     | X       |                                      |            |          |          |
| 2964G>A           | COI   | silent        | X    |     |     |         |                                      |            | X        |          |
| 3517T>C           | COII  | silent        | X    |     |     |         |                                      |            | X        |          |
| 3583T>C           | COII  | silent        | X    |     |     |         |                                      |            |          |          |
| 3685G>A           | COII  | silent        | X    |     |     |         |                                      |            | X        |          |
| 4088C>T           | A6    | silent        |      |     |     |         | X                                    | X          |          | X        |
| 4096T>C           | A6    | L>S           | X    | X   | X   | X       | X                                    | X          | X        | X        |
| 4247A>T           | A6    | silent        | X    |     |     |         |                                      |            | X        |          |
| 4592T>A           | A6    | N>K           |      |     |     |         | X                                    | X          |          | X        |
| 4599T>C           | A6    | S>P           | X    |     |     |         |                                      |            | X        |          |
| 4616A>T           | A6    | silent        |      |     |     |         |                                      |            | X        |          |
| 4620A>G           | A6    | M>V           | X    |     |     |         |                                      |            | X        |          |
| 4694G>A           | A6    | silent        |      |     |     | X       |                                      |            |          |          |
| 4762C>T           | COIII | silent        | X    |     |     |         |                                      |            | X        |          |
| 4898G>A           | COIII | V>M           |      |     |     | X       |                                      |            |          |          |

|               |            |          |   |   |   |   |   |   |   |   |   |
|---------------|------------|----------|---|---|---|---|---|---|---|---|---|
| 5212A>G       | COIII      | silent   | X |   |   |   |   |   |   | X |   |
| 5347C>T       | COIII      | silent   | X |   |   |   |   |   |   |   |   |
| 5396T>C       | COIII      | silent   |   | X | X | X | X | X | X | X | X |
| 5419C>T       | COIII      | silent   |   | X | X | X | X | X | X |   | X |
| 5524A>G       | COIII      | silent   | X | X | X | X | X | X | X |   |   |
| 5644C>T       | ND3        | silent   |   | X | X | X | X | X | X |   | X |
| 5964delAT     | intergenic |          |   | X | X |   |   |   |   |   |   |
| 5966delAT     | intergenic |          |   | X | X | X | X | X | X | X | X |
| 5966ATT>TTATA | intergenic |          | X |   |   |   |   |   |   |   |   |
| 6050insTTAAT  | intergenic |          |   |   |   |   |   |   |   | X |   |
| 6301A>C       | tRNA-glu   | TΨCloop  |   |   |   |   |   |   |   | X |   |
| 6305C>T       | tRNA-glu   | TΨCloop  | X | X | X | X | X | X | X | X | X |
| 6620A>T       | ND5        | I>M      |   | X | X | X | X | X | X |   | X |
| 6982A>G       | ND5        | silent   |   | X | X | X | X | X | X | X | X |
| 7130delCAATTC | ND5        | delIG    | X | X | X | X | X | X | X |   | X |
| 7180G>A       | ND5        | silent   | X |   |   |   |   |   |   | X |   |
| 7870G>A       | ND5        | silent   | X |   |   |   |   |   |   |   |   |
| 7888G>A       | ND5        | silent   | X |   |   |   |   |   |   | X |   |
| 7906T>C       | ND5        | silent   |   |   |   |   |   | X | X |   | X |
| 8153T>A       | tRNA-his   | DHU loop | X |   |   |   |   |   |   |   |   |
| 8875G>A       | ND4        | silent   |   |   |   |   |   |   |   | X |   |
| 8944AC>GA     | ND4        | Y>H      | X | X | X | X | X | X | X | X | X |
| 8981C>T       | ND4        | silent   | X |   |   |   |   |   |   |   |   |
| 9005A>G       | ND4        | silent   | X |   |   |   |   |   |   | X |   |
| 9044T>A       | ND4        | silent   | X |   |   |   |   |   |   | X |   |
| 9064C>A       | ND4        | V>L      |   |   |   |   |   |   |   | X |   |
| 9187A>G       | ND4        | silent   | X |   |   |   |   |   |   | X |   |
| 9783G>A       | ND4L       | silent   | X |   |   |   |   | X | X |   | X |
| 9886delT      | tRNA-thr   | TΨCloop  |   |   |   |   |   | X | X |   | X |
| 9990C>T       | ND6        | silent   | X |   |   |   |   |   |   | X |   |
| 10225C>T      | ND6        | silent   | X |   |   |   |   |   |   |   |   |
| 10289C>A      | ND6        | S>Y      |   |   |   | X |   |   |   |   |   |
| 10389C>T      | ND6        | silent   | X |   |   |   |   |   |   | X |   |
| 10905A>G      | Cyt b      | Silent   | X |   |   |   |   |   |   |   |   |
| 10925T>G      | Cyt b      | V>G      | X | X | X | X | X | X | X | X | X |
| 10935T>A      | Cyt b      | silent   | X | X | X | X | X | X | X | X | X |
| 10952AC>CA    | Cyt b      | Y>S      | X | X | X | X | X | X | X | X | X |
| 11265C>T      | Cyt b      | silent   | X |   | X |   |   |   |   | X |   |
| 11279C>A      | Cyt b      | T>N      | X | X | X | X | X | X | X | X | X |
| 11560T>C      | Cyt b      | silent   | X |   |   |   |   |   |   | X |   |
| 11893T>A      | ND1        | I>F      | X | X | X | X | X | X | X | X | X |

|            |          |        |   |   |   |   |   |   |   |   |
|------------|----------|--------|---|---|---|---|---|---|---|---|
| 11916GG>CC | ND1      | P>G    | X | X | X | X | X | X |   |   |
| 11987C>A   | ND1      | L>F    | X | X | X | X | X | X | X | X |
| 12060T>G   | ND1      | N>T    | X | X | X | X | X | X | X | X |
| 12062C>A   | ND1      | silent |   |   |   |   | X | X |   | X |
| 12091C>T   | ND1      | V>M    | X |   |   |   |   |   | X |   |
| 12131T>C   | ND1      | silent |   | X | X |   |   |   | X |   |
| 12316A>G   | ND1      | silent |   | X | X |   |   |   |   |   |
| 12344A>C   | ND1      | silent |   |   |   |   |   |   | X |   |
| 12380C>T   | ND1      | silent |   |   |   |   |   |   | X |   |
| 12626T>C   | ND1      | silent | X | X | X | X | X | X | X | X |
| 12804T>C   | LSU rRNA |        |   | X | X | X | X | X |   | X |
| 13065delA  | LSU rRNA |        |   | X | X | X | X | X |   | X |
| 13289T>A   | LSU rRNA |        | X | X | X | X | X | X | X | X |
| 13295delA  | LSU rRNA |        | X | X | X | X | X | X | X | X |
| 13561C>T   | LSU rRNA |        |   |   |   |   |   |   | X |   |
| 13587G>A   | LSU rRNA |        |   |   |   |   |   | X |   | X |
| 14698T>C   | SSU rRNA |        |   | X | X |   |   |   |   |   |

**Notes:**

All numbering based on Refseq (NCBI accession NC\_001709). Oregon R sequence from NCBI accession AF200828

New database submissions: *tko*<sup>25t</sup> original strain, full genome sequence, NCBI accession JQ686693 ; BER1 full genome sequence, NCBI accession JQ686694; Oregon R-C full genome sequence, NCBI accession JQ686698; CO3 coding region sequence, NCBI accession JQ686695;

QI2 coding region sequence, NCBI accession JQ686696; Reids-1 coding region sequence, NCBI accession JQ686697; Canton S coding region sequence, NCBI accession JQ686699

**Yellow** background denotes strain-specific polymorphisms

**Blue** background denotes polymorphisms over-represented in suppressor cytoplasms

**Grey** background denotes polymorphisms over-represented in nonsuppressor cytoplasms

Significant heteroplasmy is excluded, based on the following: our sequencing strategy involved pooling of multiple PCR products, followed by sequencing on both strands using an overlapping primer set. All novel polymorphisms were verified by additional PCR and sequencing. In no case did we find any evidence for heteroplasmy, within the limits of detection by Sanger sequencing (10-15%). Disease-associated heteroplasmy in humans is easily detected by such sequencing, with relative levels of pathological mutant mtDNA in the 50-90% range. Thus we can categorically rule out any significant contribution of heteroplasmy to the *tko*<sup>25t</sup> phenotype, in any of the strains tested. Moreover, *tko*<sup>25t</sup> breeds true phenotypically of over many generations in either the suppressor or non-suppressor background, showing standard X-linked recessive inheritance, which would not be expected if the phenotype were subject to influences of heteroplasmy. Conversely, the suppressor itself shows standard maternal inheritance, which would also not be expected if heteroplasmy were a significant factor in suppression.

**Table S2 Primers used for PCR and sequencing**

| Target gene      | Primer name  | Sequence (5' to 3')   | Purpose  |
|------------------|--------------|-----------------------|----------|
| CG5924 (Twinkle) | CG5924 left  | GCATCGTAGTGCAACCAAAA  | Q-RT-PCR |
|                  | CG5924 right | CCAAAGCGGTTCTAGTCAGC  |          |
| mtTFB2           | mtTFB2 left  | CAGGATCTACCCGCTCTCTG  | Q-RT-PCR |
|                  | mtTFB2 right | AGATGGGTGTTACGGACTCG  |          |
| tamas (Polg)     | tamas left   | AATCTCTCCAGGCGATTGA   | Q-RT-PCR |
|                  | tamas right  | CAAAGGGCAAGCGAGTGTA   |          |
| Tfam             | Tfam left    | GGCTCAGGTGGATCGATAAG  | Q-RT-PCR |
|                  | Tfam right   | GAGTGGCACCAAAAGACCAC  |          |
| mTTF             | mTTF left    | AGTTCAGAGCACCCACCAGT  | Q-RT-PCR |
|                  | mTTF right   | ACTGCAGCTAGAGGGCGTTA  |          |
| mTerf3           | mTerf3 left  | CGTCCCAGCTCTAAATTC    | Q-RT-PCR |
|                  | mTerf3 right | CGTCCCAGCTCTAAATTC    |          |
| CG8798 (Lon)     | CG8798 left  | GTTTCAGTGGCCTTCTCCAG  | Q-RT-PCR |
|                  | CG8798 right | AAAGTACCGCGAAAAGCTGA  |          |
| belphegor        | Belphegor-F  | GCCTCTTGCGCTTGACT     | Q-RT-PCR |
|                  | Belphegor-R  | TTCGAACACGTCTTTCCG    |          |
| Ets97D           | Delg-F       | TGATGGATTCATGGATGACG  | Q-RT-PCR |
|                  | Delg-R       | AGAATCATGTCCGCCAATTC  |          |
| Spargel          | Sparg-F      | CCTCGACTACATTCCGGTGCT | Q-RT-PCR |
|                  | Sparg-R      | AGACGTGCCTTCTGTCTTC   |          |



|          |          |                                |                                      |
|----------|----------|--------------------------------|--------------------------------------|
| LSU rRNA | 16S-L    | TGGCCGCAGTATTTTACTG            | Q-RT-PCR                             |
|          | 16S-R    | TCGTCCAACCATTCAATCCA           |                                      |
| SSU rRNA | 12S-L    | AAAAATTTGGCGGTATTTAGTCT        | Q-RT-PCR                             |
|          | 12S-R    | AAGGTCCATCGTGGATTATCG          |                                      |
| RpL32    | Rp49-f   | AGCATACAGGCCCAAGATCGTGAA       | Q-RT-PCR                             |
|          | Rp49-r   | CACGTTGTGCACCAGGAACCTCT        |                                      |
| mtDNA    | DsmtD1s  | GTTTTCTGCATTCATTGACTGATTTATA   | PCR of coding region (CR) fragment 1 |
|          | DsmtD1as | TTTGACATTGAAGATGTTATGGAGATTA   |                                      |
|          | DsmtD2s  | GAGAAGGAACATACCAAGGATTACATAC   | PCR of coding region (CR) fragment 2 |
|          | DsmtD2as | GAGTTAAAGTGGCATTATCAACAGCAAA   |                                      |
|          | DsmtD3s  | TCCGATTAGAAACAAAACAAATAGCCC    | PCR of coding region (CR) fragment 3 |
|          | DsmtD3as | AAAGTATTGACTAAATTGGTGCCAGCAG   |                                      |
|          | DsmtD4s  | ATCTTACCTTAATAATAAGAGCGACGGG   | PCR of NCR containing fragment       |
|          | DsmtD4as | TTAGGAAATC AAAAATGGAA AGGAGCGG |                                      |
|          | Dm189F   | AGCTACTGGGTTTCATACCCC          | Sequencing of CR fragment 1          |
|          | Dm710F   | GGTATTATTGGAGCTATTGGAGG        | Sequencing of CR fragment 1          |
|          | Dm994R   | GGAGGTAATCCTCCTAATGATAA        | Sequencing of CR fragment 1          |
|          | Dm1274F  | GTTAATAAACTAATAACCTTCAAAGC     | Sequencing of CR fragment 1          |
|          | Dm1480R  | GTCGCGATTATTGATTAAGTG          | Sequencing of CR fragment 1          |
|          | Dm1777R  | GTCAAAATCTTATATTATTTATTCGTG    | Sequencing of CR fragment 1          |
|          | Dm1825F  | AATGGAGCTGGAACAGGATG           | Sequencing of CR fragment 1          |
|          | Dm2079R  | TCCTGCTAGTACTGGAAGTG           | Sequencing of CR fragment 1          |
|          | Dm2371F  | CGAGCTTATTTACCTCAGC            | Sequencing of CR fragment 1          |
|          | Dm2659R  | GGTATCAGTGAATAAAACCTGC         | Sequencing of CR fragment 1          |
|          | Dm2896F  | GTATCACAACGACAAGTAATTTACC      | Sequencing of CR fragment 1          |
|          | Dm3125R  | GAGAAGCTCTATCTTGTAACC          | Sequencing of CR fragment 1          |

|         |                             |                             |
|---------|-----------------------------|-----------------------------|
| Dm3277F | AACTATTTTACCAGCAATTATTTTACT | Sequencing of CR fragment 1 |
| Dm3524R | AGTTTATAGGTAAAATACTCGG      | Sequencing of CR fragment 1 |
| Dm3778F | CTGAAAGCAAGTACTGGTCTC       | Sequencing of CR fragment 1 |
| Dm3780R | CAGTCATCTAATGAAGAGTTATTCTA  | Sequencing of CR fragment 1 |
| Dm4100R | AGCTAAGGGGTCTGAATACAG       | Sequencing of CR fragment 1 |
| Dm4244F | AGGACCATCAGGTCATAATGG       | Sequencing of CR fragment 1 |
| Dm4467R | CGGGTGTTTCCTTGAGGAAC        | Sequencing of CR fragment 1 |
| Dm4743F | CACACTCAAATCACCTTTCC        | Sequencing of CR fragment 1 |
| Dm5064R | GCGGGTGATAAACTTCTGTG        | Sequencing of CR fragment 1 |
| Dm5289F | CTCCATTTACTATTGCAGACTC      | Sequencing of CR fragment 1 |
| Dm5521R | TCCTCCTCATCAGTAAATTGTG      | Sequencing of CR fragment 1 |
| Dm5740F | CCAAAATCTTCATCTCGATTACC     | Sequencing of CR fragment 1 |
| Dm6074R | CAATCAATCGCTTCATATTCAG      | Sequencing of CR fragment 1 |
| Dm5314F | ACTGTAACCTGAGCCCACCA        | Sequencing of CR fragment 2 |
| Dm6005F | TTGATTGCAATTAGTTTCGACCT     | Sequencing of CR fragment 2 |
| Dm6195R | CATTAACAGTGATACGCCTC        | Sequencing of CR fragment 2 |
| Dm6801F | AAATCAATCAATTTAATATTCTACCTC | Sequencing of CR fragment 2 |
| Dm6928R | CGGTGATTTAAATTGCGGTAG       | Sequencing of CR fragment 2 |
| Dm7191F | GCCCCAGCACATATAAAACAA       | Sequencing of CR fragment 2 |
| Dm7378R | ATTAACAATATTTATAGCTGGATTAGG | Sequencing of CR fragment 2 |
| Dm7771F | AAACAAGTCCTAAACCATCTCACC    | Sequencing of CR fragment 2 |
| Dm8181R | AATTTGTGGTGTTAGTGATATGAAAA  | Sequencing of CR fragment 2 |
| Dm8740F | TGAGCAACAGATGAATAAGCAA      | Sequencing of CR fragment 2 |
| Dm8762R | TTGCTTATTCATCTGTTGCTCA      | Sequencing of CR fragment 2 |
| Dm9363F | AATCCATAAGATAATATATCACAACT  | Sequencing of CR fragment 2 |
| Dm9623R | ATGTGAAGGGGCCTTAGGTT        | Sequencing of CR fragment 2 |

|          |                              |                                     |
|----------|------------------------------|-------------------------------------|
| Dm9888R  | ATAATCTATTTTTGATTTACAAGACC   | Sequencing of CR fragment 2         |
| Dm10196R | TCATTAGAGGCTAAAGATGTTAC      | Sequencing of CR fragment 2         |
| Dm10525R | TGGGAATTCGTAAGGTTTATTC       | Sequencing of CR fragment 2         |
| Dm9858F  | CATTGGTCTGTAAATCAAAAATAAG    | Sequencing of CR fragment 3         |
| Dm10196R | TCATTAGAGGCTAAAGATGTTAC      | Sequencing of CR fragment 3         |
| Dm10465F | TTTAAAGGACCTATTCGAATAATATC   | Sequencing of CR fragment 3         |
| Dm10725R | ATAATTAACGTCTCGACAAATATG     | Sequencing of CR fragment 3         |
| Dm10950F | ATACGCTATCCCTTACTTAGG        | Sequencing of CR fragment 3         |
| Dm11258R | GGGTCTCCAATAAATTTGGTC        | Sequencing of CR fragment 3         |
| Dm11425F | TTAAGAAAATTCGAGGGATTC        | Sequencing of CR fragment 3         |
| Dm11845R | GGAACCTTACCTCGATTTCG         | Sequencing of CR fragment 3         |
| Dm12075F | GCTAATGAAATAGATACTCAAATAAA   | Sequencing of CR fragment 3         |
| Dm12244R | GCTGTGGCTCAGACTATTTTC        | Sequencing of CR fragment 3         |
| Dm12492F | GCATCACAAAAGGTTGAGG          | Sequencing of CR fragment 3         |
| Dm12584R | TTTATTAGAACGAAAAGTTTTAGGATA  | Sequencing of CR fragment 3         |
| Dm12734R | AACTATTTGGCAGATTAGTGC        | Sequencing of CR fragment 3         |
| Dm12976F | CGCTGTTATCCCTAAAGTAAC        | Sequencing of CR fragment 3         |
| Dm13172R | AGACGAGAAGACCCTATAAATC       | Sequencing of CR fragment 3         |
| Dm13390F | GGCGAATATTATTTTGCCG          | Sequencing of CR fragment 3         |
| Dm13661R | ATAATTTAATGTTTTATGGGATAAGC   | Sequencing of CR fragment 3         |
| Dm13852F | TATTTAATAAACACTGATACACAAGGT  | Sequencing of CR fragment 3         |
| Dm14152R | CTGGAAAGTGTATCTAGAATGAC      | Sequencing of CR fragment 3         |
| Dm14332F | AATATAAGCTACACCTTGATCTG      | Sequencing of CR fragment 3         |
| Dm14366R | AAAAATTTATATCAGATCAAGGTGTAG  | Sequencing of CR fragment 3         |
| Dm14502R | CGGTATTTAGTCTATCTAGAGG       | Sequencing of CR fragment 3         |
| Dm14428F | TGATTACAAATTTAAGTAAGGTCCATCG | PCR and sequencing of 'left' end of |

|          |                                             |                                                                                       |
|----------|---------------------------------------------|---------------------------------------------------------------------------------------|
|          |                                             | NCR and of adjacent CR segment                                                        |
| Dm14570F | AGGGTATCTAATCCTAGTTT                        | Sequencing of 'left' end of NCR and of adjacent CR segment                            |
| Dm14721F | AATGGTATAACCGCGACTGC                        | Sequencing of 'left' end of NCR and of adjacent CR segment; PCR of NCR repeat array I |
| Dm14787R | CCAAATTGGTGCCAGCAGTCGCGG                    | Sequencing of 'left' end of NCR and of adjacent CR segment                            |
| Dm15285F | AAAAAATTATAGATTAATTTCTTTTAAATGAC            | Sequencing of 'left' end of NCR and start of repeat array I                           |
| Dm15578F | CGAATAATAAATAATAAATAATTTATTTTAATCACTAAATCTG | PCR of NCR repeat arrays I and II and region between them                             |
| Dm17295R | GAATAGATTTTATTTAAT                          | PCR of NCR repeat array I; sequencing of region between repeat arrays I and II        |
| Dm17556F | GTATTATTTTATAAAAAATATTTATATAATAAAATCATG     | PCR and sequencing of NCR repeat array II                                             |

|          |                                            |                                                                                                       |
|----------|--------------------------------------------|-------------------------------------------------------------------------------------------------------|
| Dm17556R | CATGATTTTATTATATAAAATATTTTTTATAAAAAATAATAC | PCR of NCR repeat array I; PCR and sequencing of region between repeat arrays I and II                |
| Dm17717F | ACTATATACTAATTATAAATTAATAG                 | PCR and sequencing of NCR repeat array II                                                             |
| Dm17833R | GAGAATATAAAATTTTTATAAATTATATC              | PCR and sequencing of NCR repeat array II and region between repeat arrays I and II                   |
| Dm18026R | ATAATACATTTAAGAAATTTTTAAAAAATTTATATT       | PCR and sequencing of NCR repeat array II                                                             |
| Dm18933F | AAAATTTCTTAATGTATTATTTAATAAAAAATTACTTTTTAA | PCR of repeat array II, 'right' end of NCR and adjacent CR segment; sequencing of NCR repeat array II |
| Dm31R    | CATGATTTACCCTATC                           | Sequencing of NCR repeat array II and 'right' end of NCR                                              |

|                                |           |                                    |                                                                                                                       |
|--------------------------------|-----------|------------------------------------|-----------------------------------------------------------------------------------------------------------------------|
|                                | Dm225R    | TATAACCTTTATAAATGGGGTATGAACCCAGTAG | PCR of whole NCR and of repeat array II Sequencing of NCR repeat array II, 'right' end of NCR and adjacent CR segment |
| Wolbachia 16S rRNA             | w-16SF    | TTGTAGCCTGCTATGGTATAACT            | PCR of <i>Wolbachia</i> genomic DNA for detection assay                                                               |
|                                | w-16sR    | GAATAGGTATGATTTTCATGT              |                                                                                                                       |
| Universal 16S rRNA (bacterial) | Eub-16SF  | GCTTAACACATGCAAG                   | PCR of bacterial genomic DNA for detection assay                                                                      |
|                                | Eub-16SR  | CCATTGTAGCACGTGT                   |                                                                                                                       |
| LSU rRNA (mt)                  | mt 16S-F  | TTCGTCCAACCATTTCATTCC              | Q-PCR for copy number assay                                                                                           |
|                                | mt 16S -R | TTTGTCTAACCTGCCCACTGA              |                                                                                                                       |
| 18S rRNA (nuclear)             | 18S-F     | TTGCGAAACAACCGTAACAC               | Q-PCR for copy number assay                                                                                           |
|                                | 18S-R     | GGTAAACCGCTGAACCACTT               |                                                                                                                       |

All sequences are shown 5' to 3'
