# Supplementary material
Source: PubMed Central journal article supplement (PMC3454878)
Supplement: 448e1f23ded738acbcdf28d8ad564f63_genetics.112.143719-9.pdf [file 448e1f23ded738acbcdf28d8ad564f63_genetics.112.143719-9.pdf]

**Table S2 Primers used for PCR and sequencing**

| Target gene      | Primer name  | Sequence (5' to 3')   | Purpose  |
|------------------|--------------|-----------------------|----------|
| CG5924 (Twinkle) | CG5924 left  | GCATCGTAGTGCAACCAAAA  | Q-RT-PCR |
|                  | CG5924 right | CCAAAGCGGTTCTAGTCAGC  |          |
| mtTFB2           | mtTFB2 left  | CAGGATCTACCCGCTCTCTG  | Q-RT-PCR |
|                  | mtTFB2 right | AGATGGGTGTTACGGACTCG  |          |
| tamas (Polg)     | tamas left   | AATCTCTCCAGGCGATTGA   | Q-RT-PCR |
|                  | tamas right  | CAAAGGGCAAGCGAGTGTA   |          |
| Tfam             | Tfam left    | GGCTCAGGTGGATCGATAAG  | Q-RT-PCR |
|                  | Tfam right   | GAGTGGCACCAAAAGACCAC  |          |
| mTTF             | mTTF left    | AGTTCAGAGCACCCACCAGT  | Q-RT-PCR |
|                  | mTTF right   | ACTGCAGCTAGAGGGCGTTA  |          |
| mTerf3           | mTerf3 left  | CGTCCCGCAGTCTAAATTC   | Q-RT-PCR |
|                  | mTerf3 right | CGTCCCGCAGTCTAAATTC   |          |
| CG8798 (Lon)     | CG8798 left  | GTTTCAGTGGCCTTCTCCAG  | Q-RT-PCR |
|                  | CG8798 right | AAAGTACCGCGAAAAGCTGA  |          |
| belphegor        | Belphegor-F  | GCCTCTTGCGCTTGACT     | Q-RT-PCR |
|                  | Belphegor-R  | TTCGAACACGTCTTTCCG    |          |
| Ets97D           | Delg-F       | TGATGGATTCATGGATGACG  | Q-RT-PCR |
|                  | Delg-R       | AGAATCATGTCCGCCAATTC  |          |
| Spargel          | Sparg-F      | CCTCGACTACATTCCGGTGCT | Q-RT-PCR |
|                  | Sparg-R      | AGACGTGCCTTCTGTCTTC   |          |

|          |          |                                |                                      |
|----------|----------|--------------------------------|--------------------------------------|
| LSU rRNA | 16S-L    | TGGCCGCAGTATTTGACTG            | Q-RT-PCR                             |
|          | 16S-R    | TCGTCCAACCATTCAATCCA           |                                      |
| SSU rRNA | 12S-L    | AAAAATTTGGCGGTATTTAGTCT        | Q-RT-PCR                             |
|          | 12S-R    | AAGGTCCATCGTGGATTATCG          |                                      |
| RpL32    | Rp49-f   | AGCATACAGGCCCAAGATCGTGAA       | Q-RT-PCR                             |
|          | Rp49-r   | CACGTTGTGCACCAGGAACCTCT        |                                      |
| mtDNA    | DsmtD1s  | GTTTTCTGCATTCATTGACTGATTTATA   | PCR of coding region (CR) fragment 1 |
|          | DsmtD1as | TTTGACATTGAAGATGTTATGGAGATTA   |                                      |
|          | DsmtD2s  | GAGAAGGAACATACCAAGGATTACATAC   | PCR of coding region (CR) fragment 2 |
|          | DsmtD2as | GAGTTAAAGTGGCATTATCAACAGCAAA   |                                      |
|          | DsmtD3s  | TCCGATTAGAAACAAAACAAATAGCCC    | PCR of coding region (CR) fragment 3 |
|          | DsmtD3as | AAAGTATTGACTAAATTGGTGCCAGCAG   |                                      |
|          | DsmtD4s  | ATCTTACCTTAATAATAAGAGCGACGGG   | PCR of NCR containing fragment       |
|          | DsmtD4as | TTAGGAAATC AAAAATGGAA AGGAGCGG |                                      |
|          | Dm189F   | AGCTACTGGGTTTCATACCCC          | Sequencing of CR fragment 1          |
|          | Dm710F   | GGTATTATTGGAGCTATTGGAGG        | Sequencing of CR fragment 1          |
|          | Dm994R   | GGAGGTAATCCTCCTAATGATAA        | Sequencing of CR fragment 1          |
|          | Dm1274F  | GTTAATAAAACTAATAACCTTCAAAGC    | Sequencing of CR fragment 1          |
|          | Dm1480R  | GTCGCGATTATTGATTAAGTG          | Sequencing of CR fragment 1          |
|          | Dm1777R  | GTCAAAATCTTATATTATTTATTCGTG    | Sequencing of CR fragment 1          |
|          | Dm1825F  | AATGGAGCTGGAACAGGATG           | Sequencing of CR fragment 1          |
|          | Dm2079R  | TCCTGCTAGTACTGGAAGTG           | Sequencing of CR fragment 1          |
|          | Dm2371F  | CGAGCTTATTTACCTCAGC            | Sequencing of CR fragment 1          |
|          | Dm2659R  | GGTATCAGTGAATAAAACCTGC         | Sequencing of CR fragment 1          |
|          | Dm2896F  | GTATCACAACGACAAGTAATTTACC      | Sequencing of CR fragment 1          |
|          | Dm3125R  | GAGAAGCTCTATCTTGTAACC          | Sequencing of CR fragment 1          |

|         |                             |                             |
|---------|-----------------------------|-----------------------------|
| Dm3277F | AACTATTTTACCAGCAATTATTTTACT | Sequencing of CR fragment 1 |
| Dm3524R | AGTTTATAGGTAAAATACTCGG      | Sequencing of CR fragment 1 |
| Dm3778F | CTGAAAGCAAGTACTGGTCTC       | Sequencing of CR fragment 1 |
| Dm3780R | CAGTCATCTAATGAAGAGTTATTCTA  | Sequencing of CR fragment 1 |
| Dm4100R | AGCTAAGGGGTCTGAATACAG       | Sequencing of CR fragment 1 |
| Dm4244F | AGGACCATCAGGTCATAATGG       | Sequencing of CR fragment 1 |
| Dm4467R | CGGGTGTTTCCTTGAGGAAC        | Sequencing of CR fragment 1 |
| Dm4743F | CACACTCAAATCACCTTTCC        | Sequencing of CR fragment 1 |
| Dm5064R | GCGGGTGATAAACTTCTGTG        | Sequencing of CR fragment 1 |
| Dm5289F | CTCCATTACTATTGCAGACTC       | Sequencing of CR fragment 1 |
| Dm5521R | TCCTCCTCATCAGTAAATTGTG      | Sequencing of CR fragment 1 |
| Dm5740F | CCAAAATCTTCATCTCGATTACC     | Sequencing of CR fragment 1 |
| Dm6074R | CAATCAATCGCTTCATATTCAG      | Sequencing of CR fragment 1 |
| Dm5314F | ACTGTAACCTGAGCCCACCA        | Sequencing of CR fragment 2 |
| Dm6005F | TTGATTGCAATTAGTTTCGACCT     | Sequencing of CR fragment 2 |
| Dm6195R | CATTAACAGTGATACGCCTC        | Sequencing of CR fragment 2 |
| Dm6801F | AAATCAATCAATTTAATATTCTACCTC | Sequencing of CR fragment 2 |
| Dm6928R | CGGTGATTTAAATTGCGGTAG       | Sequencing of CR fragment 2 |
| Dm7191F | GCCCCAGCACATATAAAACAA       | Sequencing of CR fragment 2 |
| Dm7378R | ATTAACAATATTTATAGCTGGATTAGG | Sequencing of CR fragment 2 |
| Dm7771F | AAACAAGTCCTAAACCATCTCACC    | Sequencing of CR fragment 2 |
| Dm8181R | AATTTGTGGTGTTAGTGATATGAAAA  | Sequencing of CR fragment 2 |
| Dm8740F | TGAGCAACAGATGAATAAGCAA      | Sequencing of CR fragment 2 |
| Dm8762R | TTGCTTATTCATCTGTTGCTCA      | Sequencing of CR fragment 2 |
| Dm9363F | AATCCATAAGATAATATATCACAACT  | Sequencing of CR fragment 2 |
| Dm9623R | ATGTGAAGGGGCCTTAGGTT        | Sequencing of CR fragment 2 |

|          |                              |                                     |
|----------|------------------------------|-------------------------------------|
| Dm9888R  | ATAATCTATTTTTGATTTACAAGACC   | Sequencing of CR fragment 2         |
| Dm10196R | TCATTAGAGGCTAAAGATGTTAC      | Sequencing of CR fragment 2         |
| Dm10525R | TGGGAATTCGTAAGGTTTATTC       | Sequencing of CR fragment 2         |
| Dm9858F  | CATTGGTCTGTAAATCAAAAATAAG    | Sequencing of CR fragment 3         |
| Dm10196R | TCATTAGAGGCTAAAGATGTTAC      | Sequencing of CR fragment 3         |
| Dm10465F | TTTAAAGGACCTATTCTGAATAATATC  | Sequencing of CR fragment 3         |
| Dm10725R | ATAATTAACGTCTCGACAAATATG     | Sequencing of CR fragment 3         |
| Dm10950F | ATACGCTATCCCTTACTTAGG        | Sequencing of CR fragment 3         |
| Dm11258R | GGGTCTCCAATAAATTTGGTC        | Sequencing of CR fragment 3         |
| Dm11425F | TTAAGAAAATTCGAGGGATTC        | Sequencing of CR fragment 3         |
| Dm11845R | GGAACCTTACCTCGATTTCG         | Sequencing of CR fragment 3         |
| Dm12075F | GCTAATGAAATAGATACTCAAATAAA   | Sequencing of CR fragment 3         |
| Dm12244R | GCTGTGGCTCAGACTATTTTC        | Sequencing of CR fragment 3         |
| Dm12492F | GCATCACAAAAGGTTGAGG          | Sequencing of CR fragment 3         |
| Dm12584R | TTTATTAGAACGAAAAGTTTTAGGATA  | Sequencing of CR fragment 3         |
| Dm12734R | AACTATTTTGGCAGATTAGTGC       | Sequencing of CR fragment 3         |
| Dm12976F | CGCTGTTATCCCTAAAGTAAC        | Sequencing of CR fragment 3         |
| Dm13172R | AGACGAGAAGACCCTATAAATC       | Sequencing of CR fragment 3         |
| Dm13390F | GGCGAATATTATTTTGCCG          | Sequencing of CR fragment 3         |
| Dm13661R | ATAATTTTAATGTTTTATGGGATAAGC  | Sequencing of CR fragment 3         |
| Dm13852F | TATTTAATAAACACTGATACACAAGGT  | Sequencing of CR fragment 3         |
| Dm14152R | CTGGAAAGTGTATCTAGAATGAC      | Sequencing of CR fragment 3         |
| Dm14332F | AATATAAGCTACACCTTGATCTG      | Sequencing of CR fragment 3         |
| Dm14366R | AAAAATTTATATCAGATCAAGGTGTAG  | Sequencing of CR fragment 3         |
| Dm14502R | CGGTATTTTAGTCTATCTAGAGG      | Sequencing of CR fragment 3         |
| Dm14428F | TGATTACAAATTTAAGTAAGGTCCATCG | PCR and sequencing of 'left' end of |

|          |                                             |                                                                                       |
|----------|---------------------------------------------|---------------------------------------------------------------------------------------|
|          |                                             | NCR and of adjacent CR segment                                                        |
| Dm14570F | AGGGTATCTAATCCTAGTTT                        | Sequencing of 'left' end of NCR and of adjacent CR segment                            |
| Dm14721F | AATGGTATAACCGCGACTGC                        | Sequencing of 'left' end of NCR and of adjacent CR segment; PCR of NCR repeat array I |
| Dm14787R | CCAAATTGGTGCCAGCAGTCGCGG                    | Sequencing of 'left' end of NCR and of adjacent CR segment                            |
| Dm15285F | AAAAAATTATAGATTAATTTCTTTTAAATGAC            | Sequencing of 'left' end of NCR and start of repeat array I                           |
| Dm15578F | CGAATAATAAATAATAAATAATTTATTTTAATCACTAAATCTG | PCR of NCR repeat arrays I and II and region between them                             |
| Dm17295R | GAATAGATTTTATTTAAT                          | PCR of NCR repeat array I; sequencing of region between repeat arrays I and II        |
| Dm17556F | GTATTATTTTATAAAAAATATTTATATAATAAAATCATG     | PCR and sequencing of NCR repeat array II                                             |

|          |                                            |                                                                                                       |
|----------|--------------------------------------------|-------------------------------------------------------------------------------------------------------|
| Dm17556R | CATGATTTTATTATATAAAATATTTTTTATAAAAAATAATAC | PCR of NCR repeat array I; PCR and sequencing of region between repeat arrays I and II                |
| Dm17717F | ACTATATACTAATTATAAATTAATAG                 | PCR and sequencing of NCR repeat array II                                                             |
| Dm17833R | GAGAATATAAAATTTTTATAAATTATATC              | PCR and sequencing of NCR repeat array II and region between repeat arrays I and II                   |
| Dm18026R | ATAATACATTTAAGAAATTTTTAAAAAATTTATATT       | PCR and sequencing of NCR repeat array II                                                             |
| Dm18933F | AAAATTTCTTAATGTATTATTTAATAAAAAATTACTTTTTAA | PCR of repeat array II, 'right' end of NCR and adjacent CR segment; sequencing of NCR repeat array II |
| Dm31R    | CATGATTTACCCTATC                           | Sequencing of NCR repeat array II and 'right' end of NCR                                              |

|                                |           |                                    |                                                                                                                       |
|--------------------------------|-----------|------------------------------------|-----------------------------------------------------------------------------------------------------------------------|
|                                | Dm225R    | TATAACCTTTATAAATGGGGTATGAACCCAGTAG | PCR of whole NCR and of repeat array II Sequencing of NCR repeat array II, 'right' end of NCR and adjacent CR segment |
| Wolbachia 16S rRNA             | w-16SF    | TTGTAGCCTGCTATGGTATAACT            | PCR of <i>Wolbachia</i> genomic DNA for detection assay                                                               |
|                                | w-16sR    | GAATAGGTATGATTTTCATGT              |                                                                                                                       |
| Universal 16S rRNA (bacterial) | Eub-16SF  | GCTTAACACATGCAAG                   | PCR of bacterial genomic DNA for detection assay                                                                      |
|                                | Eub-16SR  | CCATTGTAGCACGTGT                   |                                                                                                                       |
| LSU rRNA (mt)                  | mt 16S-F  | TTCGTCCAACCATTTCATTCC              | Q-PCR for copy number assay                                                                                           |
|                                | mt 16S -R | TTTGTCTAACCTGCCCACTGA              |                                                                                                                       |
| 18S rRNA (nuclear)             | 18S-F     | TTGCGAAACAACCGTAACAC               | Q-PCR for copy number assay                                                                                           |
|                                | 18S-R     | GGTAAACCGCTGAACCACTT               |                                                                                                                       |

All sequences are shown 5' to 3'
