# Supplementary material
Source: PubMed Central journal article supplement (PMC3454878)
Supplement: 38443b606cff905c7c38a468d40ed3a9_genetics.112.143719-2.pdf [file 38443b606cff905c7c38a468d40ed3a9_genetics.112.143719-2.pdf]

**A**

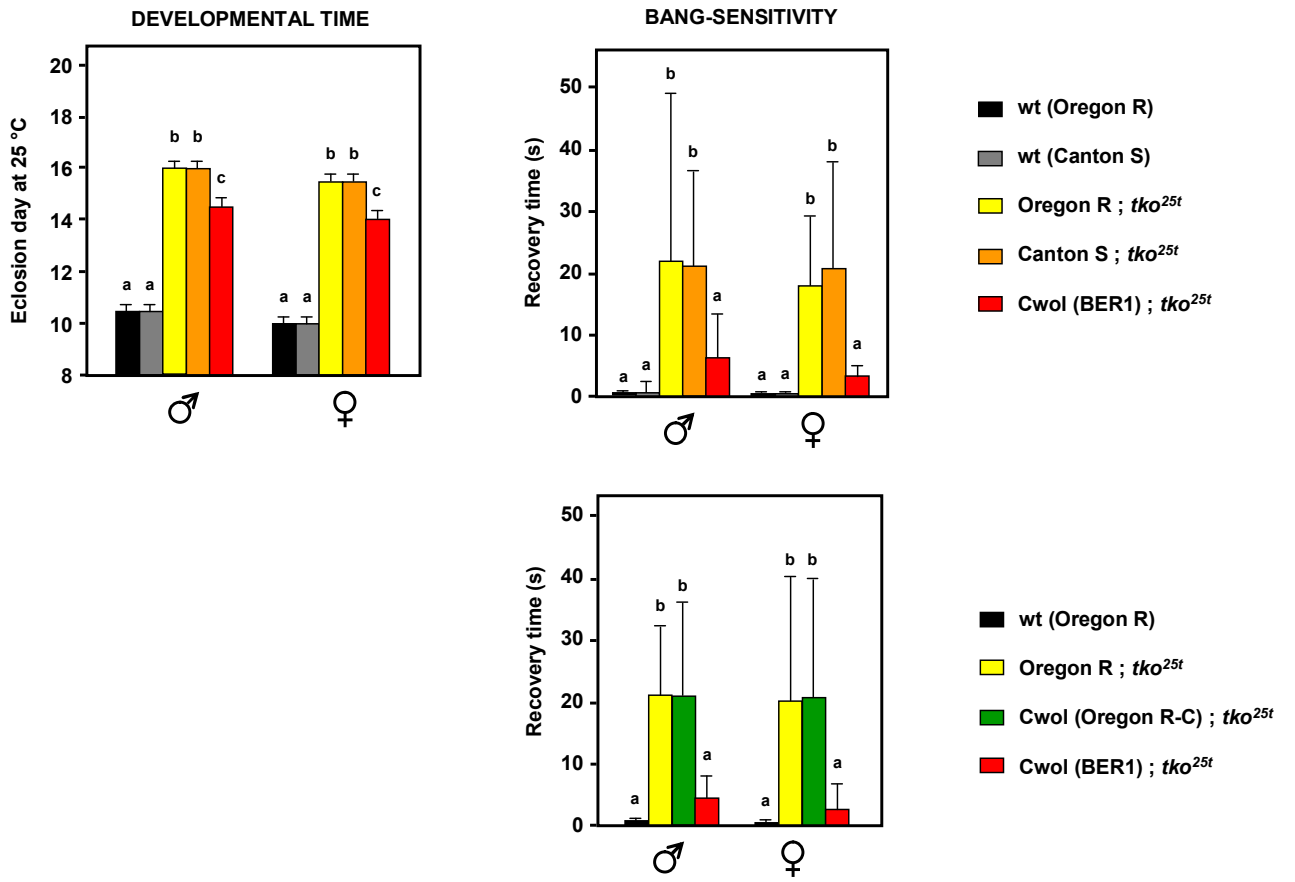

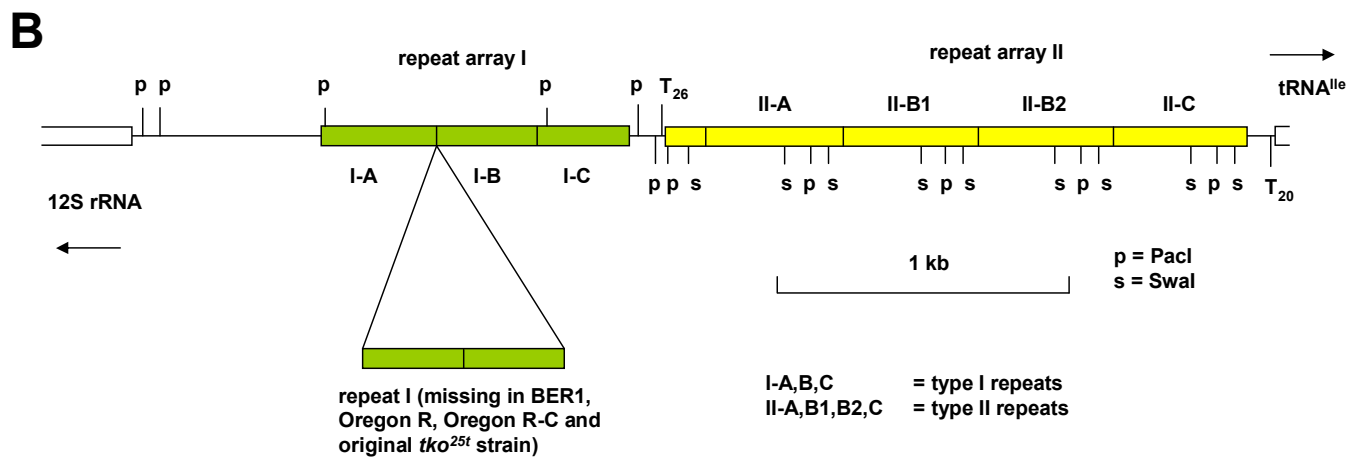

**C**

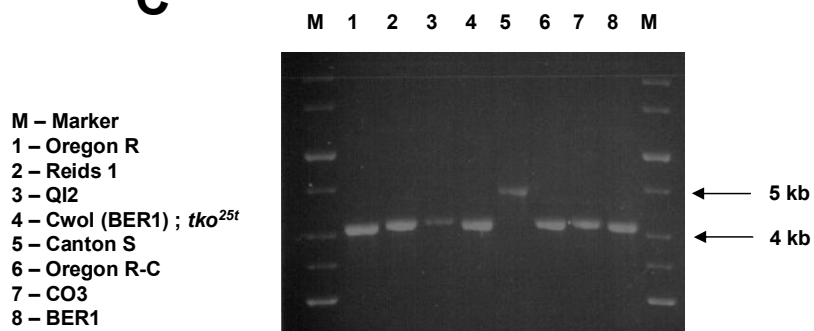

**D**

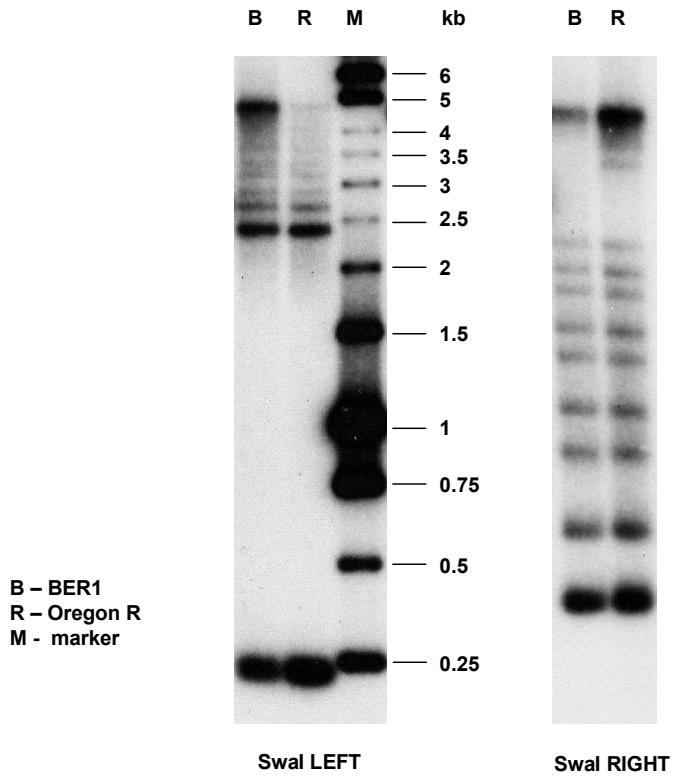

**E**

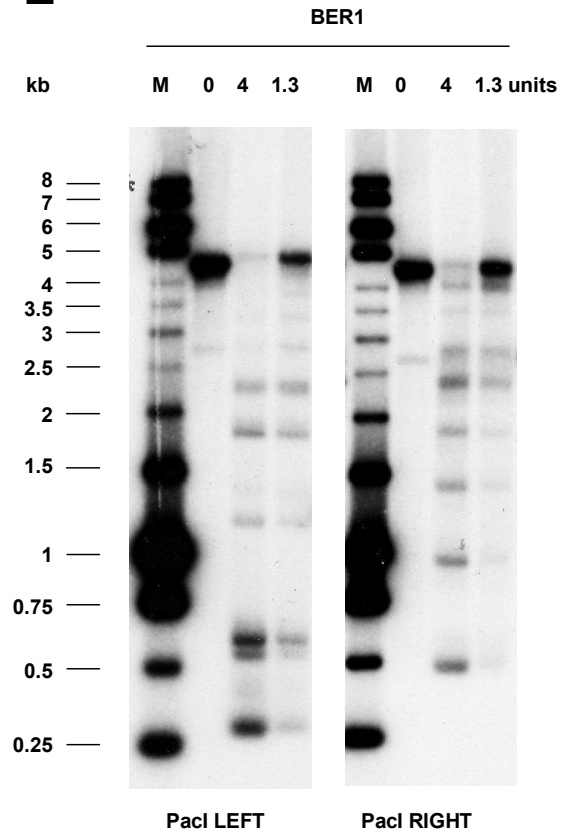

**F****type I repeats**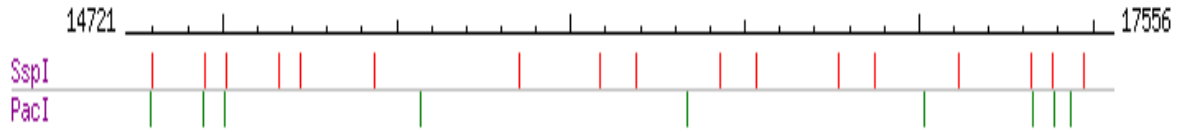**G****type II repeats**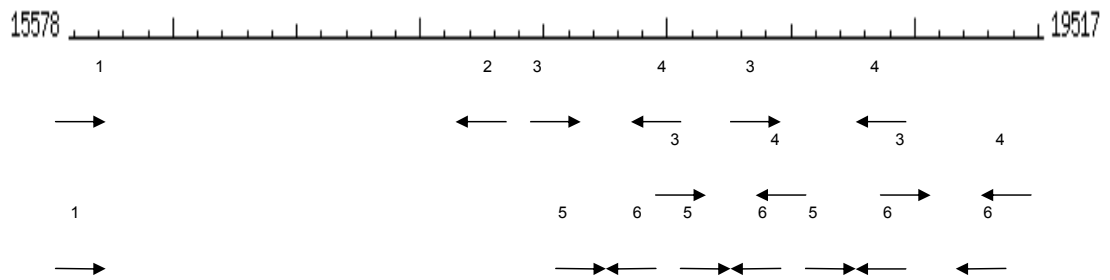

# H

Black = Refseq (NCBI accession NC\_001709)  
Blue = tk025t (original mtDNA background, NCBI accession JQ686693)  
Red = BER1 (NCBI accession JQ686694)  
turquoise background = differences from Refseq; numbering as Refseq

```
14917  A.T.T.T.T.T.A.T.T.T.T.G.A.T.T.T.T.T.T.A.T.T.A.T.T.A.A.T.T.A.A.A.T.T.A.A.T.A.A.T.T.T.T.T.A.T.A.A.A.A.A.T.A.A.T.T.T.T.T.T.T.A.A.A.G.A.A.A.A.T.T.A.A.A.T.T.A.A.T.T.T.T.A.A.T.T.A.A.A.T.T.A.A.A
A.T.T.T.T.A.T.T.T.T.G.A.T.T.T.T.T.A.T.T.A.T.T.A.A.T.T.A.A.A.T.T.A.A.T.A.A.T.T.T.T.T.A.T.A.A.A.A.A.T.A.A.T.T.T.T.T.A.A.G.A.A.A.A.T.T.A.A.A.T.T.A.A.T.T.T.T.A.A.T.T.A.A.A.T.T.A.A.A
C.T.T.T.T.A.T.T.T.T.T.A.T.T.T.T.T.A.T.T.A.T.T.A.A.T.T.A.A.A.T.T.A.A.T.T.T.T.A.T.T.A.A.A.T.A.A.T.T.T.T.T.A.A.A.G.A.A.A.A.T.T.A.A.A.T.T.A.A.T.T.T.T.A.A.T.T.A.A.A.T.T.A.A.A

15017  A.T.A.A.T.T.T.A.A.T.T.T.T.A.T.A.A.A.A.A.T.T.T.T.A.T.C.A.T.A.T.T.A.T.A.A.T.A.T.A.A.A.A.T.T.T.T.A.A.A.T.T.A.T.T.T.T.T.A.A.A.T.T.T.T.A.C.A.A.A.T.T.T.T.A.A.A.T.T.T.T.A.T.T.T
A.T.A.A.T.T.T.A.A.T.T.T.T.A.T.A.A.A.A.T.T.T.T.A.T.C.A.T.A.T.T.A.T.A.A.T.A.T.A.A.A.A.T.T.T.T.A.A.A.T.T.A.T.T.T.T.T.A.A.A.T.T.T.T.T.A.A.A.T.T.T.T.A.C.A.A.A.T.T.T.T.A.A.A.T.T.T.T.A.T.T.T
A.T.A.A.T.T.T.A.A.T.T.T.T.A.T.A.A.A.A.T.T.T.T.A.T.C.A.T.A.T.T.A.T.A.A.T.A.T.A.A.A.A.T.T.T.T.A.A.A.T.T.A.T.T.T.T.T.A.A.A.T.T.T.T.A.C.A.A.A.T.T.T.T.A.A.A.T.T.T.T.A.T.T.T

15117  T.T.T.T.T.A.A.A.A.A.A.A.T.A.A.T.T.T.T.A.C.A.A.A.A.A.A.T.A.A.T.T.A.T.C.A.A.A.T.A.T.T.A.A.T.A.A.A.T.A.A.A.T.T.T.A.A.T.T.T.T.A.A.A.T.T.A.A.A.T.T.T.T.A.A.T.T.T.T.A.C.A.C.T.T.T
T.T.T.T.T.A.A.A.A.A.A.A.T.A.A.T.T.T.T.A.C.A.A.A.A.A.A.T.A.A.T.T.A.T.C.A.A.A.T.A.T.T.A.A.T.A.A.A.T.A.A.A.T.T.T.A.A.T.T.T.T.A.A.A.T.T.A.A.A.T.T.T.T.A.A.T.T.T.T.A.C.A.C.T.T.T
T.T.T.T.T.A.A.A.A.A.A.A.T.A.A.T.T.T.T.A.C.A.A.A.A.A.A.T.T.T.T.A.T.C.A.A.A.T.T.A.A.T.A.A.T.A.A.A.T.T.T.A.A.T.T.T.T.A.A.A.T.T.T.T.A.A.T.T.T.T.A.C.A.C.T.T.T

15217  T.T.T.A.A.A.A.T.A.T.T.T.T.T.T.T.T.A.A.A.A.--A.A.A.A.T.T.T.T.T.T.T.T.T.A.A.A.A.A.A.T.T.T.T.T.T.T.T.T.A.A.A.A.A.A.T.T.T.A.A.A.A.T.T.A.G.A.T.T.A.A.T.T.C.T.T.T.T.A.A.T.G
T.T.T.A.A.A.A.T.A.T.T.T.T.T.T.T.T.A.A.A.A.--A.A.A.A.T.T.T.T.T.T.T.T.T.A.A.A.A.A.A.T.T.T.T.T.T.T.T.T.A.A.A.A.A.A.T.T.T.A.A.A.A.T.T.A.G.A.T.T.A.A.T.T.C.T.T.T.T.A.A.T.G
T.T.T.A.A.A.A.T.A.T.T.T.T.T.T.T.T.A.A.A.A.A.A.A.A.A.A.T.T.T.T.T.T.T.T.T.A.A.A.A.A.A.T.T.T.T.T.T.T.T.T.A.A.A.A.A.A.T.T.A.G.A.T.T.A.A.T.T.C.T.T.T.T.A.A.T.G

15315  A.C.T.A.A.A.A.A.A.A.--T.T.T.T.T.T.T.T.T.A.A.G.T.A.T.T.T.T.A.A.A.C.T.T.T.T.T.T.T.A.C.A.A.T.T.T.T.T.A.A.A.A.A.T.A.T.A.A.A.T.A.A.A.T.T.T.T.A.A.A.A.A.A.--T.T.T.T.T.T.T.T.T.A.A
A.C.T.A.A.A.A.A.A.A.T.T.T.T.T.T.T.T.T.A.A.G.T.A.T.T.T.T.A.A.A.C.T.T.T.T.T.T.T.A.C.A.A.T.T.T.T.T.A.A.A.A.A.T.A.T.A.A.A.T.A.A.A.T.T.T.T.A.A.A.A.A.A.T.T.T.T.T.T.T.T.T.A.A
A.C.T.A.A.A.A.A.A.A.A.T.T.T.T.T.T.T.T.T.A.A.G.T.A.T.T.T.T.A.A.A.C.T.T.T.T.T.T.T.A.C.A.A.T.T.T.T.T.A.A.A.A.A.T.A.T.A.A.A.T.A.A.A.T.T.T.T.A.A.A.A.A.A.T.T.T.T.T.T.T.T.T.A.A

15412  A.A.A.A.A.A.T.G.A.A.A.T.T.A.T.A.T.T.A.T.A.A.A.A.T.A.T.T.T.T.T.T.T.--A.C.A.A.A.A.T.G.A.A.A.T.T.T.A.A.T.C.T.A.T.T.A.A.A.A.A.A.--A.T.T.A.T.T.A.A.A.T.T.T.T.A.T.G.A.A.T.A.A.A.T.A.A.A
A.A.A.A.A.A.T.G.A.A.A.T.T.A.T.A.T.T.A.T.A.A.A.A.T.A.T.T.T.T.T.T.T.--A.C.A.A.A.A.T.G.A.A.A.T.T.T.A.A.T.C.T.A.T.T.A.A.A.A.A.A.--A.T.T.A.T.T.A.A.A.T.T.T.T.A.T.G.A.A.T.A.A.A.T.A.A.A
A.A.A.A.A.A.T.G.A.A.A.T.T.A.T.A.T.T.A.T.A.A.A.A.T.A.T.T.T.T.T.T.T.--A.C.A.A.A.A.T.G.A.A.A.T.T.T.A.A.T.C.T.A.T.T.A.A.A.A.A.A.--A.T.T.A.T.T.A.A.A.T.T.T.T.A.T.G.A.A.T.A.A.A.T.A.A.A

15510  A.A.A.G.T.A.A.A.A.T.T.T.A.T.T.A.A.A.A.T.C.A.A.T.A.T.A.T.A.T.A.T.A.A.A.A.T.A.A.T.T.T.G.A.T.T.A.T.T.A.A.T.T.A.A.A.T.T.A.T.A.C.G.A.A.T.A.A.A.T.A.T.A.A.A.A.T.A.A.T.T.T.A.T.T.T.T.A
A.A.A.G.T.A.A.A.A.T.T.T.A.T.T.A.A.A.A.T.C.A.A.T.A.T.A.T.A.T.A.T.A.A.A.A.T.A.A.T.T.T.G.A.T.T.A.T.T.A.A.T.T.A.A.A.T.T.A.T.A.C.G.A.A.T.A.A.A.T.A.T.A.A.A.A.T.A.A.T.T.T.A.T.T.T.T.A
A.A.A.G.T.A.A.A.A.T.T.T.A.T.T.A.A.A.A.T.C.A.A.T.A.T.A.T.A.T.A.T.A.A.A.A.T.A.A.T.T.T.G.A.T.T.A.T.T.A.A.T.T.A.A.A.T.T.A.T.A.C.G.A.A.T.A.A.A.T.A.T.A.A.A.A.T.A.A.T.T.T.A.T.T.T.T.A
```

15610 ATCACTAAATCTGAAATAATTA--TATATATATATATATATATATATATATATATACATATATATATATATATATATACATAAAATAAAATAAAATAAAATTTATTC  
ATCACTAAATCTGAAATAAT AAT TATATAATTATATAT ----- ATATATATATATACACACACATAAAATAAAATAAAATAAAATTTATTC  
ATCACTAAATCTGAAATAATTAAT TATATATATATATATATATATATATATATATATATATATATATATAATAAAATAAAATAAAATAAAATTTATTC

15708 CCCTATTCATAAATTTATTATATAAATTAACCTTAAAAAGTATTTTTTTTTTAAAAAAA--TTATTTATTAATTTACTTAATAAACCTATTTTTATAAT  
CCCTATTCATAAATTTATTATATAAATTAACCTTAAAAAGTATTTTTTTTTTAAAAAAA TTATTTATTAATTTACTTAATAAACCTATTTTTATAAT  
CCCTATTTATAAATTTATTATATAAATTAACCTTAAAAAGTATTTTTTTTTTAAAAAAA TTATTTATTAATTTACTTAATAAACCTATTTTTATAAT

15807 AAATTATTTTATAAATAAAATTTATTTAAAAAATTAATAAGAAATATTTTTATTATAAATAAAATAAAATAAATTTTAAAAAATTC AATTTATA--TT  
AAATTATTTTATAAATAAAATTTATTTAAAAAATTAATAAGAAATATTTTTATTATAAATAAAATAAAATAAATTTTAAAAAATTTAATTTATA--TT  
AAATTATTTTATAAATAAAATTTATTTAAAAAATTAATAAGAAATATTTTTATTATAAATAAAATAAAATAAATTTTAAAAAATTTAATTTATAATT

15905 TATATATATATATATATATATA-----ATTTAATTTT-CAATTAAA-TTATATAAATATAATAAATAAATTTATTTAATCACTAAATCTGAAA  
TATATATATATATATATA-----ATTTAATTTT-CAATTAAA-TTATATAAATATAATAAATAAATTTATTTAATCACTAAATCTGAAA  
TATATATATATATATATATATA TATATATA--ATTTTAAATTTTCGATGAAA-TTATGTAAATATAATAAATAAATTTTATTTAATCACTAAATCTGAAA

15993 TAATTAATTATATATATATATATATATA--TAAAAAATGAAAATAAATTTATCCCCCTATTCATAAATTTATTGTATAATTAACCTTAAAAATATT  
TAATTAATTATATATATATATATATATA AAT AAAAAATGAAAATAAATTTATCCCCCTATTCATAAATTTATTGTATAATTAACCTTAAAAATATT  
TAATTAATTATATATATATATATATATA--TA--TAAATGAAAATAAATTTATCCCCCTATTCATAAATTTATTGTATAATTAACCTTAAAAATATT

16091 TTTTTTTAAAAAAAATGATTTATTAATTTACTTAATAAACTATTTTTATAATAAATTTATTTTATAAATAAATAAATTTTAAATAATTAATAAAAA-  
TTTTTTTTAAAAAAAATGATTTATTAATTTACTTAATAAACTATTTTTATAATAAATTTATTTTATAAATAAATAAATTTTAAATAATTAATAAAAA-  
TTTTTTTTAAAAAAAATTAATTTATTAATTTACTTAATAAACTATTTTTATAATAAATTTATTTTATG AATAAATAATTTTAAATAATTTATAAAAA-

16190 TATTTTAAATATAATAAATAAATTTAAATGATTTTTTA-TAAAAATCAATTCATATATTTATATATATATATAC-----ATATAATTTAATTTCAATTAA  
TATTTTAAATATAATAAATAAATTTAAATGATTTTTTA-TAAAAATCAATTCATATATTTATATATATATATA TATATATATATAAATTTAATTTTC -----  
TATTTTAAATATAATAAATAAATTTAAATGATTTTTTATTAATTAATTAATTCATATATTTATATATATATATA TATATATATATAAATTTAATTTTC -----

16283 ATTATATAAGTATAATAAATAAATTTATTTTAACTCACTAAATCTGAATTAATTAATTGTATATATATATATATATATATATATATATATGTAATAAATAAAT  
-----  
-----







17946 TAATATATATATATATATAGAAAAATTAATTTATTTAAATAATTTAATAAATAATTTTTTAAAAATTTCTTAAATGTATTATTTTTATAAAAAATTTTAT  
TAATATATATATATATATAGAAAAATTAATTTATTTAAATAATTTAATAAATAATTTTTTAAAAATTTCTTAAATGTATTATTTTTATAAAAAATTTTAT  
TAATATATATATATATATAGAAAAATTAATTTATTTAAATAATTTAATAAATAATTTTTTAAAAATTTCTTAAATGTATTATTTTTATAAAAAATTTTAT

18046 ATAATAAAATCATGTTTTTTAAAAATAAACAAAAATTTTTAATAAATAAATTTTATAATGAAATATAATTTATTTATTTTCAATTTTTTAAAAAT  
ATAATAAAATCATGTTTTTTAAAAATAAACAAAAATTTTTAATAAATAAATTTTATAATGAAATATAATTTATTTATTTTCAATTTTTTAAAAAT  
ATAATAAAATCATGTTTTTTAAAAATAAACAAAAATTTTTAATAAATAAATTTTATAATGAAATATAATTTATTTATTTTCAATTTTTTAAAAAT

18146 TTTTAAAAAAAATAATTTTTTTTTAAAAAACTATATACTAATTATAAATTAATAGATATTTATATATATATAAATATTTAATATATTTATATATA  
TTTTAAAAAAAATAATTTTTTTTTAAAAAACTATATACTAATTATAAATTAATAGATATTTATATATATATAAATATTTAATATATTTATATATA  
TTTTAAAAAAAATAATTTTTTTTTAAAAAACTATATACTAATTATAAATTAATAGATATTTATATATATATAAATATTTAATATATTTATATATA

18246 T-CTAATAATTTAAATAAAAAATTTTAAAAATTTAAAAATGTAGATATAATTTATAAAAAATTTATATTCTCATATTTATTTATTTAATTTAATTTATAT  
T-CTAATAATTTAAATAAAAAATTTTAAAAATTTAAAAATGTAGATATAATTTATAAAAAATTTATATTCTCATATTTATTTATTTAATTTAATTTATAT  
TTCTAATAATTTAAATAAAAAATTTTAAAAATTTAAAAATGTAGATATAATTTATAAAAAATTTATATTCTCATATTTATTTATTTAATTTAATTTATAT

18345 AAATAATATAATGATTTAATTAATTATATATATTTATAAATTTATATATTTGAAATATTTATATAAATATATATATATATAGAAAAATTAATTTAT  
AAATAATATAATGATTTAATTAATTATTTATATATTTATAAATTTATATATTTGAAATATTTATATAAATATATATATATATAGAAAAATTAATTTAT  
AAATAATATAATGATTTAATTAATTATTTATATATTTATAAATTTATATATTTGAAATATTTATATAAATATATATATATATAGAAAAATTAATTTAT

18445 TAAATAATTTAATATAAATTTTTTAAAAATTTCTTAAATGTATTATTTTATAAAAAATTTTATATAAATAAATCATGTTTTTTAAAAATAAACAAAA  
TAAATAATTTAATATAAATTTTTTAAAAATTTCTTAAATGTATTATTTTATAAAAAATTTTATATAAATAAATCATGTTTTTTAAAAATAAACAAAA  
TAAATAATTTAATATAAATTTTTTAAAAATTTCTTAAATGTATTATTTTATAAAAAATTTTATATAAATAAATCATGTTTTTTAAAAATAAACAAAA

18545 AATTTTTAATAAATAAATTTTATAATGAAATATAAATTTATTTATTTTCAATTTTTTAAAAATTTTAAAAAAAATAATTTTTTTTTAAAAAAA  
AATTTTTAATAAATAAATTTTATAATGAAATATAAATTTATTTATTTTCAATTTTTTAAAAATTTTAAAAAAAATAATTTTTTTTTAAAAAAA  
AATTTTTAATAAATAAATTTTATAATGAAATATAAATTTATTTATTTTCAATTTTTTAAAAATTTTAAAAAAAATAATTTTTTTTTAAAAAAA

18645 CTATATACTAATTATAAATTAATAGATATTTATATATATATAAATATTTAATATATTATTATATAT-CTAATAATTTAAATAAAAAATTTTAAAAATTTAA  
CTATATACTAATTATAAATTAATAGATATTTATATATATATAAATATTTAATATATTATTATATAT-CTAATAATTTAAATAAAAAATTTTAAAAATTTAA  
CTATATACTAATTATAAATTAATAGATATTTATATATATATAAATATTTAATATATTATTATATAT-CTAATAATTTAAATAAAAAATTTTAAAAATTTAA

18744 AAATGTAGATATAATTTATAAAAAATTTATATTCATATTTATTATTATTAATTTAATTTATATAAATAATATAATGATTTAATTAATTATTATATATT  
AAATGTAGATATAATTTATAAAAAATTTATATTCATATTTATTATTATTAATTTAATTTATATAAATAATATAATGATTTAATTAATTATTATATATT  
AAATGTAGATATAATTTATAAAAAATTTATATTCATATTTATTATTATTAATTTAATTTATATAAATAATATAATGATTTAATTAATTATTATATATT

18844 TATAAATTTATATATTATTGAATATTTATATAATATATATATATATATAGAAAAATTAATTTAATAATTTAATAAATTTTAAAAATTTCTT  
TATAAATTTATATATTATTGAATATTTATATAATATATATATATATATAGAAAAATTAATTTAATAATTTAATAAATTTTAAAAATTTCTT  
TATAAATTTATATATTATTGAATATTTATATAATATATATATATATAGAAAAATTAATTTAATAATTTAATAAATTTTAAAAATTTCTT

18944 AAATGTATTATTTTATAAAAAATTTATATAAATAATCATTTTTTTTTAAAAATAAACAAAAATTTTAATAAATAAATTTATAATGAAATATAA  
AAATGTATTATTTTATAAAAAATTTATATAAATAATCATTTTTTTTTAAAAATAAACAAAAATTTTAATAAATAAATTTATAATGAAATATAA  
AAATGTATTATTTTATAAAAAATTTATATAAATAATCATTTTTTTTTAAAAATAAACAAAAATTTTAATAAATAAATTTATAATGAAATATAA

19044 TTTATTTATTTTTCATTTTTTTA-AAAAAATTTTTTAAAAAATAATTTTTTTTTAAAAAATACTATATACTAATTAATAATTAATAGATATTTATA  
TTTATTTATTTTTCATTTTTTTTAAAAAATTTTTAAAAAATAATTTTTTTTTAAAAAATACTATATACTAATTAATAATTAATAGATATTTATA  
TTTATTTATTTTTCATTTTTTTTAAAAAATTTTTAAAAAATAATTTTTTTTTAAAAAATACTATATACTAATTAATAATTAATAGATATTTATA

19143 TATATATAAATATTTAATAATTTATATATCTAATAATTTAATAAAAAATTTAAAAATTTAAAAATATAGATATAAATTTATAAAAAATTTATATTCCTC  
TATATATAAATATTTAATAATTTATATATCTAATAATTTAATAAAAAATTTAAAAATTTAAAAATGATAGATATAAATTTATAAAAAATTTATATTCCTC  
TATATATAAATATTTAATAATTTATATATCTAATAATTTAATAAAAAATTTAAAAATTTAAAAATGATAGATATAAATTTATAAAAAATTTATATTCCTC

19243 ATATTTATTTATTTAATTTAATTTATATAAATAATATAATGATTTAATTAATTTATATATTTATAAATTTATATATTTGAATATTTATATATAA  
ATATTTATTTATTTAATTTAATTTATATAAATAATATAATATTTAATTAATTTATATATTTATAAATTTATATATTTGAATATTTATATATAA  
ATATTTATTTATTTAATTTAATTTATATAAATAATATAATATTTAATTAATTTATATATTTATAAATTTATATATTTGAATATTTATATATAA

19343 TATATATATATATAGAAAAATTAATTTAATAAATTTTTCATAAAATTTAAAAAATTTCTTAAATGATTTAATAAAAAATTTACTTTTTAAAA  
TATATATATATATAGAAAAATTAATTTAATAAATTTTTCATAAAATTTAAAAAATTTCTTAAATGATTTAATAAAAAATTTACTTTTTAAAA  
TATATATATATATAGAAAAATTAATTTAATAAATTTTTCATAAAATTTAAAAAATTTCTTAAATGATTTAATAAAAAATTTACTTTTTAAAA

19443 AAAATAATTTAATTTTAAAAAATAAGTAAATAAATAAAAAAAAAAAAAAAAAA-ATGAAATTTATATTATT  
AAAATAATTTAATTTTAAAAAATAAGTAAATAAATAAAAAAAAAAAAAAAAAAATGAAATGAAATTTATATTATT  
AAAATAATTTAATTTTAAAAAATAAGTAAATAAATAAAAAAAAAAAAAAAAAA-ATGAAATTTATATTATT

**Figure S4** NCR structure and phenotypes conferred by mtDNAs of different *D. melanogaster* strains. (A) Phenotypic characterization of *tko*<sup>25t</sup> flies in the Canton S and Oregon R mtDNA backgrounds, as indicated showing both to be fully of the non-suppressor type. a, b and c denote significantly different data classes (Newman-Keuls test, *p* < 0.05, based on ANOVA, *p* < 0.001, each sex considered separately). (B) Summary map of the NCR of different strains, based on crude length determination of the NCR-containing long PCR product (DsmtD4s/ DsmtD4as) by agarose gel electrophoresis (C), restriction mapping (D,E) and DNA sequencing (F), and showing the restrictions sites used in mapping. All strains studied, apart from Canton S, were found to have the 'short' NCR morph (Panel C). Partial restriction digestion (D, E) and complete sequencing (F-H) revealed that this morph contains only three copies of repeat I, rather than the 5 seen in the 'long' morph of the reference sequence (Lewis *et al.* 1994). (D), (E) Neutral PAGE of the NCR-containing PCR product of strains BER1 and Oregon R, labeled as described in Supplementary Materials and Methods to create sub-fragments labeled at the right (tRNA-ile) or left (SSU rRNA) ends as indicated, then digested with the restriction enzymes shown (4 u, except where indicated), alongside labeled size markers. The separate sub-panels of (D) and (E) each represent sets of non-adjacent lanes from a single gel. (F, G) Sequencing strategy for the NCR, showing restriction sites in repeat array I used for cloning, and repeated priming sites for PCR in repeat array II. Primers are denoted as follows: 1 - Dm15578F, 2 - Dm17295R, 3 - Dm17556F, 4 - Dm18026, 5 - Dm17717F, 6 - Dm17833R (H) Aligned sequences of the NCR of suppressor strain BER1 and the original *tko*<sup>25t</sup> non-suppressor strain, numbered according to the reference sequence (Refseq) and color-coded as indicated. Gaps indicated by dashes.
